# Supplementary material for: Categorical Cross‐Recurrence Quantification Analysis Applied to Communicative Interaction during Ainsworth’s Strange Situation
Source: Hindawi journal article supplement (doi:10.1155/2018/4547029), 2018-01-01
Supplement: f1 [file 4547029.f1.zip]

Archive with 47 entries (38 files):
- 4547029.f1/
- 4547029.f1/Video 1/
- 4547029.f1/Video 1/Body Movements V1/
- 4547029.f1/Video 1/Body Movements V1/Original_BodyMov_Ca_V1.txt
- 4547029.f1/Video 1/Body Movements V1/Original_BodyMov_Ch_V1.txt
- 4547029.f1/Video 1/Body Movements V1/Original_BodyMov_St_V1.txt
- 4547029.f1/Video 1/Body Movements V1/Randomized_BodyMov_Ca_V1.txt
- 4547029.f1/Video 1/Body Movements V1/Randomized_BodyMov_Ch_V1.txt
- 4547029.f1/Video 1/Body Movements V1/Randomized_BodyMov_St_V1.txt
- 4547029.f1/Video 1/Grammar Structure V1/
- 4547029.f1/Video 1/Grammar Structure V1/Original_Grammar_Ca_V1.txt
- 4547029.f1/Video 1/Grammar Structure V1/Original_Grammar_Ch_V1.txt
- 4547029.f1/Video 1/Grammar Structure V1/Original_Grammar_St_V1.txt
- 4547029.f1/Video 1/Grammar Structure V1/Randomized_Grammar_Ca_V1.txt
- 4547029.f1/Video 1/Grammar Structure V1/Randomized_Grammar_Ch_V1.txt
- 4547029.f1/Video 1/Grammar Structure V1/Randomized_Grammar_St_V1.txt
- 4547029.f1/Video 1/Strange Situation Transcription V1.xlsx
- 4547029.f1/Video 1/Words V1/
- 4547029.f1/Video 1/Words V1/Original_Words_Ca_V1.txt
- 4547029.f1/Video 1/Words V1/Original_Words_Ch_V1.txt
- 4547029.f1/Video 1/Words V1/Original_Words_St_V1.txt
- 4547029.f1/Video 1/Words V1/Randomized_Words_Ca_V1.txt
- 4547029.f1/Video 1/Words V1/Randomized_Words_Ch_V1.txt
- 4547029.f1/Video 1/Words V1/Randomized_Words_St_V1.txt
- 4547029.f1/Video 2/
- 4547029.f1/Video 2/Body Movements V2/
- 4547029.f1/Video 2/Body Movements V2/Original_BodyMov_Ca_V2.txt
- 4547029.f1/Video 2/Body Movements V2/Original_BodyMov_Ch_V2.txt
- 4547029.f1/Video 2/Body Movements V2/Original_BodyMov_St_V2.txt
- 4547029.f1/Video 2/Body Movements V2/Randomized_BodyMov_Ca_V2.txt
- 4547029.f1/Video 2/Body Movements V2/Randomized_BodyMov_Ch_V2.txt
- 4547029.f1/Video 2/Body Movements V2/Randomized_BodyMov_St_V2.txt
- 4547029.f1/Video 2/Grammar Structure V2/
- 4547029.f1/Video 2/Grammar Structure V2/Original_Grammar_Ca_V2.txt
- 4547029.f1/Video 2/Grammar Structure V2/Original_Grammar_Ch_V2.txt
- 4547029.f1/Video 2/Grammar Structure V2/Original_Grammar_St_V2.txt
- 4547029.f1/Video 2/Grammar Structure V2/Randomized_Grammar_Ca_V2.txt
- 4547029.f1/Video 2/Grammar Structure V2/Randomized_Grammar_Ch_V2.txt
- 4547029.f1/Video 2/Grammar Structure V2/Randomized_Grammar_St_V2.txt
- 4547029.f1/Video 2/Strange Situation Transcription V2.xlsx
- 4547029.f1/Video 2/Words V2/
- 4547029.f1/Video 2/Words V2/Original_Words_Ca_V2.txt
- 4547029.f1/Video 2/Words V2/Original_Words_Ch_V2.txt
- 4547029.f1/Video 2/Words V2/Original_Words_St_V2.txt
- 4547029.f1/Video 2/Words V2/Randomized_Words_Ca_V2.txt
- 4547029.f1/Video 2/Words V2/Randomized_Words_Ch_V2.txt
- 4547029.f1/Video 2/Words V2/Randomized_Words_St_V2.txt
