# Supplementary material for: Categorical Cross‐Recurrence Quantification Analysis Applied to Communicative Interaction during Ainsworth’s Strange Situation
Source: Hindawi journal article supplement (doi:10.1155/2018/4547029), 2018-01-01
Supplement: f1 [file 4547029.f1.zip › 4547029.f1/Video 1/Body Movements V1/Original_BodyMov_Ca_V1.txt]

1
2
3
4
1
4
1
1
4
4
1
5
7
8
6
9
10
1
11
1
1
1
1
1
1
1
1
1
1
1
11
12
1
1
1
13
1
1
1
1
1
1
1
7
14
4
7
8
1
1
1
1
1
1
15
1
15
1
1
1
1
1
1
15
1
1
16
1
17
1
1
1
1
1
1
1
1
1
1
1
1
1
1
1
1
1
1
1
1
7
18
1
19
1
1
1
1
1
1
1
1
1
1
1
1
1
1
1
1
1
1
1
1
1
1
1
1
1
1
1
1
1
1
1
1
1
1
1
1
1
1
20
18
1
18
14
17
21
1
21
22
8
21
1
23
12
1
17
21
1
22
24
17
25
26
1
1
26
1
3
4
26
22
17
1
4
1
1
22
21
17
24
1
17
16
18
6
27
14
21
17
23
1
28
1
29
23
1
29
22
1
18
29
4
1
7
22
1
18
19
1
1
1
1
1
1
1
1
1
1
1
20
18
1
14
17
21
1
24
1
30
31
32
31
21
1
14
4
1
31
1
1
28
12
1
12
1
29
14
22
4
14
17
1
30
1
14
3
7
1
1
18
8
1
33
35
1
42
1
22
18
