# Supplementary material for: Categorical Cross‐Recurrence Quantification Analysis Applied to Communicative Interaction during Ainsworth’s Strange Situation
Source: Hindawi journal article supplement (doi:10.1155/2018/4547029), 2018-01-01
Supplement: f1 [file 4547029.f1.zip › 4547029.f1/Video 1/Body Movements V1/Original_BodyMov_Ch_V1.txt]

1
1
1
1
1
1
1
4
1
1
4
1
4
38
1
38
38
40
12
43
4
1
40
38
40
38
38
40
44
43
38
12
43
1
1
13
1
45
41
4
44
1
43
1
1
38
1
1
36
44
43
1
1
1
1
1
1
1
1
46
47
1
1
1
1
48
1
1
7
1
1
1
1
1
12
1
1
1
4
1
1
1
60
1
4
60
1
45
1
1
1
1
1
1
12
43
4
1
1
1
1
2
1
4
1
1
1
1
1
4
1
49
26
41
60
55
5
56
57
49
4
61
53
54
1
1
1
1
1
1
1
1
1
10
12
10
12
50
43
1
1
50
1
1
1
12
1
1
1
1
50
1
12
1
1
1
4
26
25
1
4
26
1
43
1
1
41
4
1
1
1
50
10
1
51
18
1
1
1
1
1
1
38
1
38
1
1
1
1
7
1
18
1
1
1
18
1
1
1
1
52
1
1
1
1
1
1
7
1
1
10
1
1
18
1
1
1
1
50
1
1
1
1
1
1
1
1
1
4
1
1
10
1
12
1
12
1
1
1
7
1
1
1
1
38
1
1
1
12
1
1
1
8
1
1
1
1
38
1
7
18
