# Supplementary material for: Categorical Cross‐Recurrence Quantification Analysis Applied to Communicative Interaction during Ainsworth’s Strange Situation
Source: Hindawi journal article supplement (doi:10.1155/2018/4547029), 2018-01-01
Supplement: f1 [file 4547029.f1.zip › 4547029.f1/Video 1/Body Movements V1/Original_BodyMov_St_V1.txt]

1
1
1
1
1
1
1
1
1
1
1
1
1
1
1
1
1
1
1
1
1
1
1
1
1
1
1
1
1
1
1
1
1
1
20
8
1
1
1
1
1
1
10
1
1
1
1
1
1
1
1
1
12
1
1
1
1
9
30
1
9
46
1
15
1
1
1
1
1
1
7
27
14
1
1
55
4
1
1
4
1
4
1
4
1
1
12
1
32
1
1
4
1
1
1
32
1
29
1
17
22
4
60
3
4
60
1
43
7
18
8
1
10
1
1
1
1
1
1
1
1
1
1
1
7
18
17
22
4
25
7
18
8
1
1
1
1
1
1
27
1
7
18
19
1
1
1
1
1
1
1
1
1
1
1
1
1
1
1
1
1
1
1
1
1
1
1
1
1
1
1
1
1
1
1
1
1
1
1
1
1
1
1
1
1
1
1
1
1
1
1
1
1
1
1
1
1
1
1
1
1
1
20
1
18
14
17
1
4
24
1
1
1
1
1
8
1
1
1
7
18
19
1
1
1
1
1
1
1
1
1
1
1
1
1
1
1
1
1
1
1
1
1
1
1
1
1
1
1
1
1
1
1
1
1
1
1
1
1
1
1
