# Supplementary material for: Categorical Cross‐Recurrence Quantification Analysis Applied to Communicative Interaction during Ainsworth’s Strange Situation
Source: Hindawi journal article supplement (doi:10.1155/2018/4547029), 2018-01-01
Supplement: f1 [file 4547029.f1.zip › 4547029.f1/Video 1/Body Movements V1/Randomized_BodyMov_Ca_V1.txt]

1
1
1
1
1
1
7
1
1
1
1
1
21
1
3
7
1
17
1
4
18
4
1
35
14
17
11
1
1
22
6
1
1
1
1
1
1
22
1
12
22
23
1
1
1
1
1
1
7
1
17
1
1
8
4
1
1
22
21
1
1
29
1
1
1
1
1
15
1
1
1
1
1
18
1
1
24
1
1
1
4
1
1
18
21
17
1
18
1
1
1
1
1
1
1
1
4
17
1
1
1
2
1
1
1
1
26
1
24
26
17
12
1
6
1
23
1
1
1
1
8
1
33
17
20
1
1
14
1
32
4
21
4
18
17
29
19
1
1
16
1
1
1
13
1
14
19
22
16
7
1
1
1
5
8
24
1
1
1
42
3
1
18
1
1
1
1
3
21
7
31
1
1
10
1
12
14
1
1
29
1
1
1
8
1
1
25
1
22
17
18
21
1
1
30
28
14
22
4
1
1
30
1
11
1
27
15
1
1
4
1
29
31
1
7
21
9
17
1
1
1
14
1
1
1
1
1
1
1
14
1
1
1
1
31
1
28
18
1
21
22
1
18
1
1
26
1
4
15
1
1
1
12
1
20
1
1
14
1
1
23
