# Supplementary material for: Categorical Cross‐Recurrence Quantification Analysis Applied to Communicative Interaction during Ainsworth’s Strange Situation
Source: Hindawi journal article supplement (doi:10.1155/2018/4547029), 2018-01-01
Supplement: f1 [file 4547029.f1.zip › 4547029.f1/Video 1/Body Movements V1/Randomized_BodyMov_Ch_V1.txt]

4
1
12
51
1
1
1
10
1
7
49
1
1
4
1
36
4
1
1
1
4
1
1
55
38
38
1
1
50
1
1
38
50
4
1
50
18
10
18
38
40
38
1
1
12
1
1
1
12
1
1
1
1
1
1
1
1
1
1
12
50
1
1
18
1
40
1
12
7
54
10
1
1
1
1
38
1
1
1
1
1
1
12
1
1
1
57
1
4
7
1
1
1
1
1
1
1
1
61
1
1
1
1
4
60
1
1
1
26
1
1
1
50
44
49
1
1
1
4
1
10
41
12
1
1
1
1
1
1
1
1
44
1
41
52
43
8
1
1
4
1
1
1
1
1
25
43
1
1
1
1
4
43
4
26
1
1
1
1
1
18
4
12
5
1
12
26
1
1
1
1
1
1
1
2
43
1
1
1
38
1
1
1
1
1
1
47
4
1
38
18
53
1
45
1
1
1
40
56
1
1
1
43
1
7
43
43
1
44
1
1
1
10
1
1
12
4
1
1
1
1
45
1
1
1
13
1
40
43
1
1
38
1
60
1
1
1
38
1
4
12
1
1
38
1
1
48
1
1
1
1
46
1
41
1
60
7
38
1
1
1
