# Supplementary material for: Categorical Cross‐Recurrence Quantification Analysis Applied to Communicative Interaction during Ainsworth’s Strange Situation
Source: Hindawi journal article supplement (doi:10.1155/2018/4547029), 2018-01-01
Supplement: f1 [file 4547029.f1.zip › 4547029.f1/Video 1/Body Movements V1/Randomized_BodyMov_St_V1.txt]

1
1
18
7
1
1
1
4
1
1
1
1
1
27
1
1
1
1
30
1
1
1
1
1
1
1
1
8
1
1
1
9
1
1
1
1
7
1
1
1
1
1
1
1
22
60
1
1
1
18
1
1
1
1
17
1
1
1
1
4
43
1
1
1
14
7
1
1
1
1
1
8
1
1
1
1
1
1
25
18
8
1
22
1
1
1
1
12
1
1
1
1
1
1
19
20
1
20
27
46
1
1
1
10
1
3
4
10
1
1
1
4
1
1
1
1
1
1
1
1
1
1
55
1
4
12
1
1
18
1
1
1
1
1
1
1
1
14
18
1
1
1
1
1
1
1
1
1
7
1
1
1
17
1
1
1
1
1
1
1
1
1
1
1
1
1
1
4
1
1
1
24
1
1
8
4
1
1
1
1
1
1
1
1
1
1
1
7
1
19
1
1
1
1
1
17
1
1
1
1
1
1
1
9
1
1
1
1
1
1
1
1
1
1
1
1
1
1
1
1
1
1
1
1
1
1
1
1
1
1
1
32
1
1
1
7
1
1
1
32
1
1
1
1
1
60
1
18
29
1
1
15
1
4
1
4
1
1
1
1
1
