# Supplementary material for: Categorical Cross‐Recurrence Quantification Analysis Applied to Communicative Interaction during Ainsworth’s Strange Situation
Source: Hindawi journal article supplement (doi:10.1155/2018/4547029), 2018-01-01
Supplement: f1 [file 4547029.f1.zip › 4547029.f1/Video 1/Grammar Structure V1/Original_Grammar_Ca_V1.txt]

13
5
7
8
8
8
10
8
11
12
5
5
13
8
11
10
10
8
12
6
11
6
8
8
8
6
7
6
6
8
12
6
8
6
8
10
6
8
11
8
6
6
5
8
13
10
8
10
5
9
11
10
7
8
5
1
1
1
1
12
10
10
1
1
1
1
1
10
8
8
1
10
8
6
5
7
5
7
9
13
1
1
1
10
6
8
6
5
7
7
1
1
1
13
10
8
1
1
1
1
1
1
1
1
1
1
1
1
1
1
1
1
1
1
1
1
10
10
1
1
1
1
1
1
10
1
1
1
1
1
1
1
1
1
1
1
13
10
1
1
1
1
1
1
1
1
1
1
1
1
1
1
1
1
1
1
1
1
1
1
1
1
1
1
1
1
1
1
1
1
1
1
1
10
1
1
1
1
1
1
1
1
1
1
1
1
1
1
1
1
1
1
1
1
1
1
1
1
1
1
1
1
1
1
1
10
1
1
1
13
10
1
1
1
13
10
5
6
10
1
1
1
8
12
8
5
7
12
5
5
10
1
1
1
1
1
1
1
1
13
10
5
9
10
11
10
10
1
10
8
11
8
12
8
1
1
1
1
1
1
1
1
1
1
1
1
1
1
1
1
1
1
1
1
1
1
1
1
1
1
1
1
1
1
1
1
1
1
1
1
1
1
1
1
1
1
1
1
1
1
1
1
1
1
1
1
1
1
1
1
1
1
1
1
1
1
1
1
1
1
1
1
1
1
1
1
1
1
1
1
1
1
1
1
1
1
1
1
1
1
1
1
1
1
1
1
1
1
1
1
1
1
1
1
1
1
1
1
1
1
1
1
1
1
1
1
1
1
1
1
1
1
1
1
1
1
1
1
1
1
1
16
15
1
8
10
8
12
10
8
8
6
7
1
8
8
1
10
13
10
12
10
8
8
6
8
6
8
10
8
10
9
12
6
7
10
8
7
1
6
16
11
6
7
8
12
10
1
10
8
10
8
8
10
10
10
8
12
6
6
8
6
11
10
16
1
8
8
1
6
8
6
12
1
10
1
8
8
1
1
1
10
10
7
1
1
1
1
1
10
8
8
11
8
6
12
6
7
12
6
16
8
12
8
6
7
1
8
12
8
6
7
10
8
10
8
8
12
8
6
7
1
1
8
1
1
1
1
1
1
1
1
1
1
1
1
1
1
1
1
1
1
8
12
10
1
1
1
10
8
6
8
6
8
13
10
8
1
10
10
6
16
6
16
10
8
10
8
12
6
7
12
6
7
11
6
7
6
16
6
16
10
8
10
8
12
6
7
12
6
7
11
6
7
1
8
8
8
8
13
10
1
8
8
6
7
6
7
12
8
6
7
1
6
8
10
6
16
6
8
10
6
16
1
8
8
1
1
1
8
10
10
8
8
6
8
10
6
16
16
6
16
16
10
10
6
12
8
14
7
1
12
10
8
12
6
12
8
6
9
8
12
7
9
8
12
5
7
8
1
13
13
1
8
10
16
10
8
12
10
6
8
12
10
1
1
8
8
12
8
8
8
8
12
6
7
