# Supplementary material for: Categorical Cross‐Recurrence Quantification Analysis Applied to Communicative Interaction during Ainsworth’s Strange Situation
Source: Hindawi journal article supplement (doi:10.1155/2018/4547029), 2018-01-01
Supplement: f1 [file 4547029.f1.zip › 4547029.f1/Video 1/Grammar Structure V1/Original_Grammar_Ch_V1.txt]

22
22
1
1
1
1
1
1
1
1
1
1
1
1
1
1
1
1
1
1
1
1
1
1
1
1
1
1
1
1
1
1
1
1
1
1
1
1
1
1
1
1
1
1
1
1
1
1
1
1
1
1
1
1
1
1
34
32
1
31
31
31
1
32
1
32
1
1
1
1
1
1
1
1
33
33
33
33
33
1
32
42
1
1
1
1
1
1
1
1
1
1
1
1
1
1
1
1
1
1
1
1
1
1
1
1
1
1
1
1
1
1
1
1
1
1
1
1
1
1
1
1
1
1
1
1
1
1
1
1
1
1
1
1
1
1
13
10
1
1
1
1
1
1
1
1
1
1
1
1
1
1
1
1
1
1
1
1
1
1
1
1
1
1
1
1
1
1
1
1
1
1
1
1
1
1
1
1
1
1
1
1
1
1
1
1
1
1
1
1
1
1
1
1
1
1
1
1
1
1
1
1
1
1
1
1
1
1
31
1
1
1
1
1
32
32
1
1
1
1
1
1
1
1
1
1
1
1
1
1
1
1
1
1
1
1
1
1
1
1
1
1
1
1
1
1
1
1
1
1
1
1
1
1
1
1
1
1
1
1
1
1
1
1
31
1
1
1
1
1
1
1
1
1
1
1
1
1
1
1
1
1
1
1
1
1
1
1
33
1
1
1
1
1
1
1
1
1
1
1
1
1
1
1
1
1
1
1
1
1
1
1
1
1
1
1
1
1
1
1
43
1
1
1
1
1
1
1
1
1
1
1
1
1
1
1
1
1
1
1
1
1
43
21
1
1
1
1
1
1
1
1
1
1
1
1
1
41
41
1
1
31
1
32
31
1
32
1
32
1
21
21
1
1
1
1
43
1
1
21
1
1
1
43
1
1
1
1
1
1
1
1
1
1
1
1
1
33
1
1
1
1
1
1
1
1
1
1
1
1
1
1
1
1
1
1
1
1
1
1
1
1
1
1
1
1
1
31
41
1
1
1
1
1
1
1
1
1
1
1
1
1
1
1
1
1
1
1
1
1
1
1
42
21
1
1
1
1
1
21
1
1
1
1
43
1
21
1
23
1
1
1
1
1
1
1
1
1
1
1
1
1
1
1
1
1
21
1
1
1
1
1
1
1
1
1
1
1
1
1
1
43
21
1
1
2
1
23
1
23
1
1
1
23
1
1
1
1
1
1
23
1
1
1
1
1
23
1
1
1
1
1
1
1
1
1
23
1
1
1
1
1
1
1
1
1
1
1
1
1
1
1
1
1
1
1
1
1
1
1
1
1
1
1
1
1
1
1
1
1
1
1
1
1
1
1
1
1
1
1
1
1
21
1
1
1
1
1
1
1
1
1
41
1
1
1
1
1
1
1
1
1
1
1
1
1
1
21
1
1
1
1
1
1
1
1
1
1
1
1
1
1
1
1
1
1
1
1
1
1
21
1
1
1
1
1
1
1
1
1
1
1
1
1
1
1
1
1
1
1
1
1
1
1
1
1
1
1
1
1
1
1
1
1
1
32
1
1
1
1
1
1
1
1
1
1
