# Supplementary material for: Categorical Cross‐Recurrence Quantification Analysis Applied to Communicative Interaction during Ainsworth’s Strange Situation
Source: Hindawi journal article supplement (doi:10.1155/2018/4547029), 2018-01-01
Supplement: f1 [file 4547029.f1.zip › 4547029.f1/Video 1/Grammar Structure V1/Original_Grammar_St_V1.txt]

1
1
1
1
1
1
1
1
1
1
1
1
1
1
1
1
1
1
1
1
1
1
1
1
1
1
1
1
1
1
1
1
1
1
1
1
1
1
1
1
1
1
1
1
1
1
1
1
1
1
1
1
1
1
1
1
1
1
1
1
1
1
1
1
1
1
1
1
1
1
1
1
1
1
1
1
1
1
1
1
1
1
1
1
1
1
1
1
1
1
1
13
10
8
1
1
1
10
6
8
16
6
7
9
10
8
10
12
8
8
10
8
12
8
6
7
9
1
1
10
6
8
8
6
7
1
6
8
12
7
14
7
12
8
10
8
15
11
10
6
8
7
6
8
12
6
10
6
8
8
12
8
10
15
8
12
8
10
7
10
6
8
12
8
10
6
8
10
8
12
8
12
6
7
10
15
10
6
8
8
12
6
7
8
12
8
10
7
15
10
12
8
12
8
12
6
10
8
10
8
12
11
9
15
12
6
7
1
1
1
12
11
8
9
7
1
1
1
1
1
10
7
8
1
1
1
1
1
1
1
1
1
13
10
11
8
15
12
12
7
1
15
8
12
8
1
1
1
1
1
1
1
1
1
15
8
10
6
8
12
7
13
10
8
1
13
9
8
8
8
8
8
12
6
7
8
12
6
7
8
8
12
6
7
8
12
8
10
1
8
8
10
10
1
8
10
8
6
6
1
10
15
10
10
8
1
8
10
10
8
8
10
10
10
8
8
12
6
7
1
1
8
8
12
6
7
11
12
6
7
6
8
6
8
16
8
12
8
8
10
12
8
10
1
10
8
10
12
6
7
11
12
6
7
8
8
1
8
6
10
1
1
1
1
1
1
1
1
1
1
10
8
6
6
8
1
10
8
1
1
1
1
1
1
1
1
1
1
1
1
1
1
1
1
1
1
1
1
1
1
1
1
1
1
1
1
1
1
1
1
1
1
1
1
1
1
1
1
1
1
1
1
1
1
1
1
1
1
1
1
1
1
1
1
1
1
1
1
1
1
1
1
1
1
1
1
1
1
1
1
1
1
1
1
1
1
1
1
1
1
1
1
1
1
1
1
1
1
1
1
1
1
1
1
1
1
1
1
1
1
1
1
1
1
1
1
1
1
1
1
1
1
1
1
1
1
1
1
1
1
1
1
1
1
1
1
1
1
1
1
1
10
8
1
10
10
8
12
6
7
1
1
1
1
1
1
1
1
1
1
1
1
1
1
1
1
1
1
1
1
1
1
1
1
1
1
1
1
1
1
1
1
1
1
1
1
1
1
1
1
1
1
1
1
1
1
1
1
1
1
1
1
1
1
1
1
1
1
1
1
1
1
1
1
1
1
1
1
1
1
1
1
1
1
1
1
1
1
1
1
1
1
1
1
1
1
1
1
1
1
1
1
1
1
1
1
1
1
1
1
1
1
1
1
1
1
1
1
1
1
1
1
1
1
1
1
1
1
1
1
1
1
1
1
1
1
1
1
1
1
1
1
1
1
1
1
1
1
1
1
1
1
1
1
1
1
1
1
1
1
1
1
1
1
1
1
