# Supplementary material for: Categorical Cross‐Recurrence Quantification Analysis Applied to Communicative Interaction during Ainsworth’s Strange Situation
Source: Hindawi journal article supplement (doi:10.1155/2018/4547029), 2018-01-01
Supplement: f1 [file 4547029.f1.zip › 4547029.f1/Video 1/Grammar Structure V1/Randomized_Grammar_Ca_V1.txt]

8
6
10
8
1
10
1
6
1
1
1
1
1
1
8
16
1
10
10
6
10
5
10
10
1
8
6
16
11
6
10
7
7
12
6
1
8
7
1
6
10
8
6
1
1
13
8
12
6
12
1
1
1
1
1
8
6
1
10
1
1
6
8
8
10
1
1
1
1
1
1
8
10
1
7
1
10
8
12
1
1
7
8
1
7
1
1
8
10
8
10
1
8
12
1
1
8
8
1
5
1
1
8
10
6
1
12
1
10
6
10
8
1
1
1
7
1
12
6
12
12
12
1
1
1
16
1
13
16
12
12
5
1
6
1
12
1
1
1
10
1
1
8
1
8
8
1
6
12
1
1
1
1
8
12
1
1
1
1
8
12
1
7
10
10
1
8
1
1
1
6
1
10
8
8
6
12
1
16
1
1
1
1
12
8
12
1
1
1
7
1
7
12
1
10
6
1
12
7
1
1
8
9
1
8
1
1
10
1
1
1
1
6
1
8
8
8
8
1
1
8
8
10
10
1
1
1
7
8
1
9
1
1
1
1
7
10
1
12
1
12
1
1
1
1
1
8
1
6
1
1
8
10
1
11
8
1
1
13
7
1
1
1
1
1
1
1
1
16
10
1
1
1
7
8
1
8
11
1
7
8
6
10
10
8
1
8
1
9
10
1
1
1
8
6
1
10
1
8
8
10
1
1
8
9
1
1
10
1
1
6
1
8
7
10
1
8
13
10
1
10
6
1
8
1
1
10
8
8
8
1
8
1
8
6
1
6
8
7
1
1
8
1
5
8
13
11
6
1
10
1
1
5
8
1
6
16
6
1
8
12
1
1
8
5
1
10
5
1
8
16
1
1
1
8
1
8
6
6
10
1
1
1
1
1
16
1
10
8
7
1
1
1
10
5
1
1
1
10
1
1
1
8
1
10
1
1
10
1
1
8
6
1
8
6
1
1
1
1
6
6
5
1
6
8
1
10
6
13
12
8
1
8
10
8
8
1
1
1
1
7
8
12
1
6
7
1
1
12
1
1
1
10
1
12
8
11
1
1
11
1
1
1
8
1
1
6
6
10
10
1
8
11
1
1
12
1
6
6
1
13
1
10
13
1
6
1
8
13
11
10
10
1
7
1
8
1
1
12
8
6
6
1
1
1
1
12
6
1
10
5
7
11
6
1
8
8
11
14
10
8
1
7
6
6
1
16
6
10
1
7
7
1
16
1
1
7
1
10
1
10
5
16
13
13
8
1
1
1
1
1
1
1
1
6
1
8
8
5
1
1
10
8
1
1
10
1
16
1
1
8
1
6
8
1
1
12
1
10
8
12
1
12
1
1
1
9
8
8
10
16
13
1
1
8
6
1
7
1
5
11
1
1
10
6
8
11
1
1
1
1
1
13
1
1
16
1
10
6
8
1
1
1
1
1
1
1
10
1
7
1
1
8
5
1
1
8
10
1
1
1
1
1
1
1
1
1
1
1
6
1
1
1
10
1
1
8
7
10
6
1
1
1
15
9
1
10
1
13
1
1
1
1
5
1
1
