# Supplementary material for: Categorical Cross‐Recurrence Quantification Analysis Applied to Communicative Interaction during Ainsworth’s Strange Situation
Source: Hindawi journal article supplement (doi:10.1155/2018/4547029), 2018-01-01
Supplement: f1 [file 4547029.f1.zip › 4547029.f1/Video 1/Grammar Structure V1/Randomized_Grammar_Ch_V1.txt]

1
1
1
1
1
1
1
1
1
1
1
1
1
1
1
1
1
1
1
1
1
1
1
1
21
1
1
1
1
1
31
1
1
1
1
21
1
1
1
1
1
1
1
1
1
1
1
1
1
1
1
1
1
1
1
23
1
1
1
1
23
1
1
1
42
1
21
1
1
1
1
1
1
1
1
1
1
1
1
1
1
1
33
1
21
1
1
1
1
1
1
1
22
1
1
1
1
1
1
1
32
1
1
1
43
1
1
1
1
32
1
1
1
1
1
1
1
21
1
1
1
1
1
31
1
33
1
1
1
1
1
1
1
1
41
1
1
1
1
1
32
1
1
1
1
1
1
33
1
1
1
1
1
1
1
1
1
1
1
1
1
1
1
1
1
1
1
1
1
1
1
1
1
31
1
1
1
23
31
1
1
2
1
1
1
1
1
1
1
1
1
1
1
1
1
1
1
1
1
1
1
1
1
21
1
1
1
1
1
1
1
1
1
1
32
1
1
1
1
1
1
1
1
1
1
1
1
1
1
1
1
1
1
1
1
1
1
1
1
1
1
1
1
1
1
1
1
1
1
1
1
1
1
1
1
1
1
1
1
31
1
1
1
1
1
1
1
33
1
1
1
1
1
1
1
1
1
21
1
1
1
1
1
1
1
1
1
1
1
1
1
1
32
1
1
1
13
1
1
1
1
1
1
31
1
1
1
1
1
43
1
1
1
1
33
1
1
1
1
1
1
1
1
1
1
1
1
21
1
1
1
1
1
1
1
1
1
1
1
1
1
1
1
1
1
1
1
1
1
41
1
1
1
1
1
1
1
1
10
1
1
1
1
1
1
1
1
1
1
32
1
1
1
1
1
1
1
1
1
1
1
1
1
1
1
41
1
1
1
1
1
32
1
1
1
1
1
1
1
43
1
1
43
1
1
1
1
1
32
1
1
1
1
1
1
1
1
1
1
1
1
1
1
1
1
1
1
1
1
1
1
1
1
1
1
31
1
1
1
1
1
1
1
1
1
1
1
1
32
1
1
1
1
1
1
1
1
1
1
1
1
1
1
1
1
1
1
1
1
1
1
1
1
1
1
32
1
1
1
1
1
1
1
1
1
1
1
1
1
1
1
1
1
1
1
1
1
1
1
1
43
1
1
1
1
1
1
1
1
1
1
1
1
1
1
1
1
1
1
1
1
1
1
1
1
21
1
1
1
1
1
1
1
1
1
1
1
1
1
33
1
1
1
1
1
1
1
1
1
1
1
1
1
1
1
1
1
1
1
1
1
1
1
1
1
23
1
1
1
1
1
1
1
1
1
1
21
1
1
1
1
1
1
1
1
1
1
1
22
1
1
1
41
1
1
42
31
1
1
1
1
1
21
1
1
1
43
1
1
1
1
1
1
1
1
23
1
1
1
1
1
1
1
1
1
1
1
1
1
1
1
1
1
1
1
1
1
1
21
1
23
1
1
1
1
1
1
1
1
1
1
1
1
23
1
1
1
1
1
33
1
1
1
1
1
34
1
1
1
1
1
1
1
1
1
1
