# Supplementary material for: Categorical Cross‐Recurrence Quantification Analysis Applied to Communicative Interaction during Ainsworth’s Strange Situation
Source: Hindawi journal article supplement (doi:10.1155/2018/4547029), 2018-01-01
Supplement: f1 [file 4547029.f1.zip › 4547029.f1/Video 1/Grammar Structure V1/Randomized_Grammar_St_V1.txt]

1
10
1
1
15
1
1
10
1
6
1
1
1
12
6
1
8
1
8
1
8
1
1
1
1
1
8
10
1
1
1
1
1
1
1
6
1
1
6
1
1
6
12
1
10
8
1
8
1
1
8
1
1
6
8
8
1
1
1
1
1
1
10
1
1
1
1
1
7
6
12
1
7
1
1
1
12
1
1
1
8
8
12
1
8
8
10
12
10
1
1
1
1
1
1
1
7
1
12
7
1
1
12
1
1
1
8
1
10
1
1
1
1
7
8
1
1
1
1
8
10
1
12
14
1
9
10
1
1
7
10
1
10
1
1
1
1
1
1
12
1
10
9
12
1
1
1
8
10
1
10
1
1
6
8
1
1
8
1
8
1
1
1
1
1
1
1
1
1
1
6
10
1
1
1
1
1
1
8
1
10
1
6
1
1
1
1
8
1
1
6
1
1
1
1
7
11
7
1
1
8
1
8
7
7
10
12
16
8
12
1
1
1
8
8
1
12
1
8
1
1
6
1
15
1
1
15
1
8
10
1
1
7
1
1
1
1
1
1
8
1
1
1
1
1
1
8
1
1
1
1
1
1
1
9
1
10
1
1
1
8
8
1
1
1
8
1
1
1
1
8
1
1
1
12
10
10
12
1
1
7
1
1
12
6
1
6
1
1
1
1
1
1
1
1
1
10
1
1
1
1
7
1
1
8
8
8
6
1
7
1
1
1
1
1
1
1
6
1
1
1
1
1
8
1
8
1
1
1
1
1
10
1
13
12
13
1
1
1
8
1
10
1
10
1
1
1
1
6
12
1
15
11
1
1
1
1
1
1
1
1
8
10
7
1
10
1
1
1
1
1
1
1
7
12
1
1
1
12
1
1
1
1
1
1
10
1
1
1
8
1
12
12
1
8
10
11
8
1
1
1
1
12
1
1
1
1
6
1
12
1
1
1
8
1
1
1
1
1
1
8
1
8
10
8
1
9
1
1
1
1
7
1
8
6
1
1
1
1
1
1
1
1
1
15
1
1
1
6
1
12
1
1
1
1
10
1
1
1
1
1
12
1
1
1
1
1
15
8
1
1
8
9
12
1
1
1
7
1
1
1
1
8
1
1
1
1
1
10
11
1
1
13
1
6
7
8
1
1
1
1
8
1
8
1
1
8
7
1
8
6
1
1
1
10
7
6
1
1
1
6
12
1
1
10
1
1
8
1
1
1
1
8
6
1
1
10
1
1
1
6
8
8
1
1
1
10
1
1
1
12
1
1
1
8
1
10
8
1
1
1
1
1
1
1
1
1
1
8
1
1
1
1
8
1
1
10
1
1
1
1
11
1
1
8
8
6
1
11
1
1
1
8
7
1
1
1
1
8
1
1
10
1
7
7
1
1
1
1
8
1
8
1
1
1
1
10
10
12
1
12
6
6
1
1
15
1
1
1
1
1
1
1
6
1
12
1
1
1
1
1
15
1
1
10
15
1
13
1
1
1
1
1
1
10
1
10
8
6
1
8
6
10
8
8
6
1
1
8
12
1
1
6
1
1
16
