# Supplementary material for: Categorical Cross‐Recurrence Quantification Analysis Applied to Communicative Interaction during Ainsworth’s Strange Situation
Source: Hindawi journal article supplement (doi:10.1155/2018/4547029), 2018-01-01
Supplement: f1 [file 4547029.f1.zip › 4547029.f1/Video 1/Strange Situation Transcription V1.xlsx]

## Sheet: Strange Situation V1
Palabras sujeto 1 (M)	Palabras sujeto 2 (N)	Palabras sujeto 3 €		Movimientos sujeto 1	Movimientos sujeto 2	Movimientos sujeto 3		Miradas sujeto 1	Miradas sujeto dos	Miradas sujeto 3
Uuuuu, el otro	Llorareclamo	.		.	.	.		Mjgt1	.	.
Sentémosno	.	.		Tjgt1	.	.		Mnñ	Mjgt1	.
Quieres jugar, así mira	.	.		Tjgt2	.	.		.	Mjgt2	.
O con el avión, uuuu	.	.		Tjgt3	.	.		.	Mjgt2	.
¿Quieres o no?	.	.		.	.	.		.	Mjgt3	.
Así mira, a ti que te gusta	.	.		.	.	.		.	Mhdl	.
Mira, tócalo	.	.		Tjgt3	.	.		Mjgt3	Mjgt3	.
Ese otro	.	.		.	.	.		Mjgt3	.	.
Tú, te toca a ti	.	.		.	.	.		Mnñ	Mjgt2y3	.
Toma, te toca	.	.		.	Tjgt3	.		Mnñ	.	.
Ahí lo tienes que poner. Yo te los paso	.	.		Tjgt3	.	.		Mnñ	Mjgt3	.
Yuuuu, ahí, ponelo ahí	.	.		Tjgt3	.	.		.	Mjgt3	.
El amarillo, y aquí otro, ponlos todos	.	.		.	Tjgt3	.		.	.	.
.	.	.		Tjgt4	.	.		.	.	.
.	.	.		Slv	Tjgt3	.		.	.	.
.	.	.		Ssnt	Mdjgt3	.		Mnñ	MaMm	.
.	BalbuceaO	.		Tppl	.	.		Mppl	Mjgts	.
.	BalbuceaEe	.		Mvm	Mvjgt3	.		Mnñ	Mhdl	.
.	.	.		Mvbr	Mdjgt3	.		Mppl	Mjgt3	.
.	.	.		.	Gpjgt3	.		.	Msl	.
Eso muy bien	GritaAa	.		Mvcbnñ	Snr	.		Mnñ	.	.
.	.	.		.	Sltjgt3	.		.	.	.
.	.	.		.	Tjgt3	.		Mnñ	.	.
.	.	.		.	.	.		Mppl	Mhdl	.
.	.	.		.	Gpjgt3	.		.	.	.
.	BalbuceaEe	.		.	Mdjgt3	.		.	.	.
.	.	.		.	Gpjgt3	.		.	Mjgt3	.
.	.	.		.	Mdjgt3	.		Mppl	Mjgt3	.
.	.	.		.	Mdjgt3	.		.	.	.
.	BalbuceaEe	.		.	Gpjgt3	.		Mppl	Mjgt3	.
.	.	.		.	Lvjgt3	.		.	.	.
.	.	.		.	Sltjgt3	.		.	Msl	.
.	.	.		Mvcbnñ	Gpjgt1	.		.	.	.
Te gusta viste	.	.		Snr	Snr	.		Mnñ	.	.
.	.	.		.	Sltjgt3	.		.	Mjgt1	.
.	.	.		.	.	.		Mppl	Msl	.
¿Te gustó ese?	.	.		.	.	.		Mnñ	MaMm	.
El cubo	GritaIii	.		.	.	.		Mnñ	Mjgt1	.
El cubo verde	GritaIii	.		.	.	Etrsal		Mnñ	Mhdl	.
Ayy	.	.		MvcbExñ	MvcbExñ	Ssnt		MrExñ	MrExñ	Mppl
.	BalbuceaEe	.		.	.	.		Mnñ	Mjgt1	.
.	GritaEee	.		.	Mvdohdl	.		.	.	.
.	.	.		.	Sltjgt1	.		.	.	.
.	.	.		.	Tjgt3	.		Mppl	.	.
Si te gustó ese	.	.		.	Lvjgt3	.		Mnñ	.	.
El círculo, círculo	.	.		.	.	.		.	Mjgt3	.
.	.	.		.	Sltjgt3	Mvbr		.	.	Mppl
.	.	.		Slv	.	.		.	.	.
.	.	.		Sagch	.	.		Mnñ	.	.
.	.	.		Tjgt3	Mdjgt3	.		.	MrExñ	.
.	.	.		Slv	.	.		.	.	.
.	.	.		Ssnt	.	.		Mppl	MaMm	.
.	.	.		.	Mvjgt3	.		.	.	.
.	.	.		.	Lvjgt3	.		Mnñ	.	.
.	.	.		.	Sltjgt3	.		Mnñ	MrExñ	.
.	.	.		.	.	.		.	Mjgt3	.
.	.	Hola, ¿cómo está?		.	.	.		.	MrExñ	MaMm
Hola, bien gracias	.	.		.	.	Snr		MrExñ	.	.
.	.	Bueno yo soy Camila, la persona extraña. No sé si Carla le había comentado que iba a entrar una persona desconocida		.	.	.		.	.	.
Si, si	.	.		Ascb	.	.		.	.	MaMm
.	.	Bueno yo voy hacer ese papel		.	.	.		MrExñ	.	.
Ya	.	.		.	.	.		.	.	Mhdl
.	.	Nosotros funcionamos con golpes en el espejo para saber cuando viene cada parte		.	.	.		.	MrExñ	.
Aaa, ya.	.	Entonces cuando se escucharon esos golpecitos me indicaba a mí que yo debía empezar a hablarle		Ascb	.	.		.	Mhdl	.
.	.	Ya. Luego va a sonar otro golpe que me va indicar a mí que yo tengo que bajar a jugar con la niña.		.	.	Mvm		.	.	.
Ya	.	Ya		.	.	Mvmnñ		.	.	.
Ya	.	Después cuando yo esté jugando con la niña, van a sonar dos golpes, seguidos, que le van a indicar a usted que tiene que retirarse lo más sigilosamente luego de la sala.		.	MvdohMm	.		Mnñ	MaMm	.
.	.	.		.	GthMm	Mvm		.	.	Mnñ
.	.	.		.	.	MvdohMm		.	.	.
.	BalbuceaAa	.		.	.	.		.	.	.
Mmm, ya.	.	Eso es		Ascb	.	Ascb		.	.	.
.	.	¿Tiene alguna duda?		.	.	.		Mnñ	.	.
Mmm, no.	BalbuceaEe	.		.	LvmMm	.		.	.	.
Era eso solamente	.	.		Tmmnñ	.	.		.	.	.
.	.	¿Qué edad tiene?		.	.	.		.	.	Mnñ
Va a cumplir un año en una semana más	.	.		Tmnñ	Slv	.		.	Mhdl	.
.	.	Aaa ya, pero esta casi en el año		.	.	.		.	.	MaMm
Mmm, si	.	.		.	.	.		.	.	.
Lo terrible ahora es cuando… ya	.	Ahora voy a verla		.	.	Slv		MrExñ	.	.
…cuando está recién empezando a caminar	.	.		.	.	Dppl		Mnñ	Mhdl	Mrsill
.	.	Ahora necesito que usted esté en silencio		.	.	Sagch		.	.	.
.	.	Hola, ¿cómo estás?		.	.	.		.	.	Mnñ
.	BalbuceaAa	.		.	Snr	.		.	Mrhld	.
.	.	Hola preciosa, ¿quieres jugar?		.	.	Tcjgt4		Mnñ	.	Mrjgts
.	.	Mira, ¿quieres jugar con la jiraja?		.	.	Tjgt3		.	Mjgt3	.
.	.	¿Juguemos con la jirafa?		.	.	.		Mppl	.	Mnñ
.	.	¿Quieres jugar con la jirafa?		.	Tjgt3	.		.	.	.
.	.	Mira, los ponemos aquí		.	.	Tjgt3		.	.	.
.	BalbuceaIi	.		.	.	.		.	MrExñ	.
.	.	Mira, pongamos esto acá		.	.	Tjgt3		.	Mjgt3	Mnñ
.	.	.		.	Jgjgt3	.		Mnñ	.	.
.	.	Mira, si, pone este tú		.	.	Tjgt3		.	MrExñ	Mnñ
.	.	.		.	Tjgt3	.		MrExñ	.	.
.	.	Ahí		.	Jgjgt3	.		.	.	.
.	.	Listo, muy bien		.	.	Snr		.	.	Mnñ
.	.	Viste		.	Mvdohdl	.		.	Msl	Mnñ
.	.	.		.	.	Tcnñ		Mnñ	.	.
.	.	.		Slv	.	.		.	Mhdl	.
.	.	Pongamos estp acá		Cm	.	.		.	MaMm	.
.	.	Oye, Pongamos esto aquí		.	.	Tjgt3		.	MrExñ	Mnñ
.	.	No quieres jugar con el avión		SLsal	.	.		.	Mhdl	.
.	.	Juguemos con el avión		.	.	.		.	.	.
.	GritaIii	.		.	Snr	.		.	.	.
.	.	¿Quieres jugar con el avioncito?		.	Sltjgt3	Tcnñ		.	.	.
.	.	¿O con la jirafita?		.	Tjgt3	.		.	Mjgt3	.
.	.	Te gusto esta		.	.	Apjgt3		.	.	Mjgt3
.	.	Oye Flo, sentémonos a jugar		.	.	.		.	MrExñ	.
.	.	Sentémonos aquí a jugar		.	.	Tmnñ		.	.	.
.	GritaIii	Ahí		.	.	Stnñ		.	.	Mnñ
.	Llora	.		.	Tjgt1	Tjgt3		.	.	Mnñ
.	.	Ahí mira		.	.	Jgjgt3		.	.	.
.	.	No con la jirafita, ¿y con el avioncito?		.	Tjgt3	Tjgt2		.	Mjgt3	.
.	.	¿Pongámoslo?, mira		.	.	Tjgt3		.	MrExñ	.
.	.	.		.	.	Jgjgt3		.	Mjgt3	.
.	.	.		.	.	.		.	Mjgt1	.
.	GritaAa	Ponlo tú		.	.	.		.	.	.
.	.	Ahí		.	.	Sltjgt3		.	.	.
.	.	.		.	.	Slv		.	MrExñ	.
.	.	.		.	Tjgt3	Cm		.	Mjgt3	Mrsill
.	.	.		.	.	Ssnt		.	.	.
.	.	.		.	MvdohExñ	.		.	MrExñ	Mppl
.	.	.		.	Jgjgt1y3	Mvbr		.	.	.
.	BalbuceaAa	.		.	Sltjgt1	.		.	Mjgt1y3	.
.	.	.		.	Jgjgt3	.		.	.	.
.	.	.		.	Tcjgt4	.		.	Mjgt4	.
.	BalbuceaEe	.		.	Tjgt4	.		.	.	.
.	BalbuceaAa	.		.	Jgjgt1y4	.		.	Mjgt1y4	.
.	.	.		.	Jgjgt4	.		.	.	.
.	BalbuceaEe	.		.	MvdohExñ	.		.	Mjgt2	.
.	.	.		.	Tjgt3	.		.	MrExñ	.
.	.	.		.	.	.		.	Mjgt3	.
.	BalbuceaEe	.		.	Mvprn	.		.	.	.
.	.	.		.	Gt	.		.	.	Mnñ
.	.	.		.	.	Slv		.	.	.
.	.	.		.	.	Cm		.	.	.
.	Llora	¿Qué pasó?		.	.	Tmnñ		.	.	.
.	.	¿Te lo paso?		.	.	Stnñ		.	Mjgt3	.
.	.	.		.	.	Tjgt3		.	.	Mnñ
.	GritaIii	Ahí están		.	.	Tjgt1y3		.	.	.
.	.	.		.	.	Slv		.	.	.
.	Llora	.		Etrsal	.	Cm		.	.	.
.	.	.		Cm	.	Ssnt		.	MaMm	.
Florencia, hola	.	.		.	Mvbr	.		Mnñ	.	.
.	GritaIii	.		Cm	Snr	.		.	.	.
Oye, ¿cómo estai?	.	.		Sagch	Mvbr	.		Mnñ	MaMm	.
¿Con quien estai?	.	.		Tmnñ	Snr	.		.	.	.
Venga mi cosita	.	.		Bsnñ	AbMm	.		.	.	.
.	.	.		.	Sltjgt3	.		.	.	.
Sigamos jugando	.	.		Bsnñ	.	Dppl		.	.	Mnñ
.	.	.		Stnñ	.	.		Msl	Msl	.
Ya	BalbuceaIi	.		Ssnt	AbMm	Slv		Mnñ	.	.
Upa, ya	.	.		Bsnñ	.	Cm		Mnñ	MrExñ	.
¿A quién estas mirando?	.	.		.	.	SLsal		.	.	.
Se va	.	.		Tccbnñ	.	.		Mnñ	MrExñ	.
Se fue	.	.		Snr	Snr	.		Mhdl	Mhdl	.
¿Quíen está ahí?, linda de la mamá	.	.		.	.	.		Mnñ	MrMm	.
No hay nadie	.	.		.	.	.		Mrhatr	Mrhatr	.
.	.	.		Tmnñ	.	.		Mhdl	Mhdl	.
La Florencia y la mamá	.	.		Bsnñ	.	.		Msl	MaMm	.
Juguemos de nuevo	.	.		.	.	.		.	.	.
.	BalbuceaAa	.		Stnñ	AbMm	.		.	.	.
¿Qué pasó?	GritaAa	.		Abnñ	.	.		.	.	.
No quiere estar más acá	.	.		Tmnñ	Snr	.		.	.	.
Ya	.	.		Tjgt1y3	.	.		.	Mjgt1y3	.
¿Juguemos con este?	.	.		Jgjgt1y3	.	.		Mnñ	.	.
¿Te gusta este o no?	.	.		.	.	.		.	.	.
Azul	.	.		.	Tjgt3	.		.	.	.
.	.	.		Jgjgt1y3	Jgjgt1y3	.		.	.
Golpéalo, golpéalo	.	.		.	Tjgt1y3	.		.	.	.
.	.	.		Tjgt2	.	.		Mjgt2	.	.
.	.	.		Tjgt3	Tjgt3	.		.	Mjgt1	.
Tú, toca tú	.	.		Jgjgt1y3	Jgjgt1y3	.		.	.	.
Eso	GritaEee	.		Stnñ	.	.		.	.	.
.	Llora	.		Tmnñ	Sltjgt3	.		.	.	.
Que	.	.		.	.	.		.	.	.
.	.	.		Tjgt3	.	.		.	Mjgt3	.
Chocale, chocale	.	.		.	Sltjgt1	.		.	.	.
.	.	.		.	Tjgt3	.		.	.	.
.	Llora	.		Stnñ	.	.		.	.	.
.	.	.		Bsnñ	.	.		.	.	.
.	.	.		Tmnñ	.	.		.	.	.
Ya	.	.		Abnñ	AbMm	.		Mnñ	.	.
Tanta cosa	.	.		.	Mvbr	.		.	.	.
.	GritaIii	.		Tmnñ	.	.		.	.	.
.	.	.		Tmmnñ	TmmMm	.		.	.	.
.	.	.		Cm	Cm	.		.	.	.
.	Llora	.		Tppl	.	.		.	.	.
.	.	.		Dppl	.	.		.	.	.
.	.	.		Sagch	.	.		Mnñ	MaMm	.
.	.	.		Bsnñ	.	.		.	.	.
.	.	.		Tmnñ	.	.		.	.	.
.	Lloramásfuerte	.		Tccbnñ	.	.		.	Mhdl	.
No quieres jugar más	.	.		.	Mdjgt3	.		.	.	.
Mira ¿quién es?	.	.		Aphdl	.	.		Mhdl	Mhdl	.
La mamá con la Flo	.	.		.	Mdjgt3	.		.	.	.
Vamos a buscar la jirafa	.	.		Aphjgt3	.	.		Mnñ	Mhdl	.
.	Llora	.		Tccbnñ	.	.		.	.	.
Vamos a buscar la jirafa que está allí	.	.		.	.	.		.	.	.
Mira	.	.		Aphjgt3	.	.		.	.	.
Vamos a buscar la jirafa	.	.		Stnñ	Slv	.		.	.	.
.	GritaIii	.		.	.	.		.	.	.
.	Llora	.		Cm	Cm	.		.	.	.
Mira	.	.		Aphjgt3	.	.		.	.	.
.	.	.		Tjgt3	.	.		Mnñ	Mjgt3	.
.	Llora	.		.	.	.		.	.	.
.	.	.		Slv	Cm	.		Mhdl	Mhdl	.
.	.	.		Stnñ	.	.		.	.	.
.	Lloramásfuerte	.		.	.	.		.	.	.
.	.	.		Cm	.	.		.	MaMm	.
.	.	.		SLsal	.	.		.	.	.
.	Lloramásfuerte	.		.	Tcjgt2	.		.	Mjgt2	.
.	.	.		.	.	.		.	Mjgt3	.
.	.	.		.	.	Etrsal		.	.	.
.	.	.		.	.	.		.	MrExñ	Mnñ
.	.	.		.	.	Cm		.	.	.
.	.	.		.	.	Sagch		.	.	.
.	.	¿Qué pasó?		.	.	Tmnñ		.	.	.
.	Lloramásfuerte	.		.	Slv	.		.	.	Mjgt3
.	.	Ya, ya		.	.	Tjgt3		.	.	Mnñ
.	.	Juguemos con la jirafa		.	.	Abnñ		.	.	.
.	Lloramásfuerte	.		.	Mvbr	.		.	.	.
.	.	.		Etrsal	.	.		.	.	.
.	.	.		Cm	.	.		.	MaMm	.
Venga para acá	.	.		.	Cm	.		.	.	.
.	.	.		Sagch	.			Mnñ	.	.
.	Lloramásfuerte	.		Tmnñ	.	Ssnt		.	.	.
.	.	.		Bsnñ	.	.		.	.	.
Ya pasó	.	.		.	.	.		.	.	.
Nos vamos	.	.		.	.	.		.	.	.
Nos vamos, hola	.	.		.	.			.	MrExñ	.
Ya	.	.		.	.	.		Mhdl	Mhdl	.
Mira	Lloramásfuerte	.		.	.	.		Mnñ	MaMm	.
.	.	.		Abnñ	AbMm	.		.	.	.
Ya, ya	.	.		.	.	Slv		.	.	.
La Florencia, la Florencia, donde está, aquí está	.	.		Mvnñ	.	Cm		Mnñ	MrExñ	.
En la casita, con la mamita y el papá	.	.		Cnt	.	SLsal		.	.	.
La Florencia, la Florencia, donde está, aquí está (Cnt	.	.		Tcnñ	.	.		Mnñ	Mhdl	.
En la casita, con la mamita y el papá	.	.		Cnt	.	.		.	.	.
.	.	.		Bsnñ	.	.		.	.	.
¿Quieres jugar?, ¿quieres jugar?	.	.			.	.		Msl	.	.
Mmm, ya	.	.		Sagch	.	.		Mjgt3	.	.
.	.	.		Tjgt3	.	.		.	Mjgt3	.
Tome, tome	Llora	.		.	Tjgt3	.		.	.	.
La jirafa, la jirafa	.	.		Cnt	.	.		.	.	.
Como hace la jirafa	.	.		.	.	.		.	Mjgt3	.
.	GritaAa	.		.	Mvbr	.		.	.	.
¿Quién esta ahí?	.	.		Aphdl	.	.		Mhdl	Mhdl	.
La Flo	.	.		Snr	Snr	.		.	.	.
¿Quién esta ahí?	.	.		.	.	.		.	.	.
La Flo	.	.		Snr	Snr	.		.	.	.
.	.	.		.	.	.		.	Mjgt3	.
¿Quieres tomarlo?	.	.		Aphjgt3	.	.		.	.	.
.	.	.		Sagch	.	.		.	.	.
.	Llora	.		Stnñ	Slv	.		.	.	.
.	.	.		Tjgt3	.	.		.	.	.
Tómalo	.	.		Sagch	.	.		.	Tjgt3	.
Ya, que paso	.	.		Tmnñ	.	.		.	.	.
Mira ¿quién esta ahí?	.	.		.	.	.		.	.	.
La Florencia Pascal	.	.		.		.		Mnñ	Mhdl	.
La Florencia Pascal	.	.		Mvnñ	Mdjgt3	.		.	.	.
Si. No te lo eches a la boca	.	.		.	.	.		.	.	.
.	Llora	.		.	.	.		Mnñ	.	.
Que, no quieres que te lo saque	.	.		.	.	.		.	.	.
Esta sucio	.	.		.	.	.		.	Msl	.
¿Quieres otro juego?	.	.		.	.	.		.	.	.
Ya	.	.		Sagch	.	.		.	.	.
Juguemos con el avión mira	.	.		Tjgt2	.	.		.	Mjgt2	.
.	.	.		Slv	Snr	.		.	.	.
Guuujuu	.	.		.	.	.		Mjgt2	.	.
Guuujuu	.	.		.	.	.		Mnñ	.	.
.	.	.		Cm	.	.		.	.	.
Sentémosnos aquí	.	.		Ssnt	Ssnt	.		.	Mrhatr	.
Florencia	.	.		.	.	.		Mrhatr	.	.
¿Qué hay para allá?	.	.		.	.	.		.	.	.
¿Quieres ir para allá	.	.		Apsill	.	.		Mnñ	Mrsill	.
.	.	.		Mvjgt2	.	.		.	Mjgt2	.
.	BalbuceaEe	.			.	.		.	.	.
¿Vamos?	.	.		Sljgt2	Mdjgt3	.		.	.	.
Vamos a Cmr	.	.		.	.	.		.	.	.
Vamos Cmndo	.	.		Stnñ	Slv	.		.	.	.
Vamos de la manito	.	.		Cm	Cm	.		.	.	.
Estructura gramatical				Movimiento corporal				Movimiento ocular
1	Silencio			1	.	Silencio		1	.	Silencio
2	Lenguaje inarticulado (Llanto)			2	Tjgt1	Toma juguete 1		2	Mjgt1	Mira juguete 1
21	Llanto			3	Tjgt2	Toma juguete 2		3	Mjgt2	Mira juguete 2
22	Llanto reclamo			4	Tjgt3	Toma juguete 3		4	Mjgt3	Mira juguete 3
23	Llanto más fuerte			5	Tjgt4	Toma juguete 4		5	Mjgt4	Mira juguete 4
3	Lenguaje inarticulado (Balbuceo)			6	Tppl	Toma papel		6	Mnñ	Mira a la niña
31	Balbucea "Aa"			7	Slv	Se levanta		7	Mppl	Mira el papel
32	Balbucea "Ee"			8	Ssnt	Se sienta		8	MrExñ	Mira al extraño
33	Balbucea "Ii"			9	Mvm	Mueve manos		9	Msl	Mira el suelo
34	Balbucea "Oo"			10	Mvbr	Mueve brazos		10	Mhdl	Mira hacia delante
4	Lenguaje inarticulado (Grito)			11	Mvcbnñ	Mueve cabeza hacia la niña		11	Mrhatr	Mira hacia atrás
41	Grita "Aa"			12	Snr	Sonrie		12	Mrsill	Mira la silla
42	Grita "Ee"			13	MvcbExñ	Mueva cabeza hacia el extraño		13	MaMm	Mira a la madre
43	Grita"Ii"			14	Sagch	Se agacha		14	Mjgt1y3	Mira juguete 1 y 3
5	Artículo			15	Ascb	Asienta con la cabeza		15	Mjgt1y4	Mira juguete 1 y4
6	Pronombre			16	Tmmnñ	Toma mano de la niña		16	Mjgt2y3	Mira juguete 2 y 3
7	Sustantivo			17	Tmnñ	Toma a la niña		17	Mjgts	Mira juguetes
8	Verbo			18	Cm	Camina
9	Adjetivo			19	SLsal	Sale de la sala
10	Adverbio			20	Etrsal	Entra a la sala
11	Conjunción			21	Bsnñ	Besa a la nima
12	Preposición			22	Stnñ	Sienta a la niña
13	Interjección			23	Tccbnñ	Toca cabeza de la niña
14	Contracción			24	Abnñ	Abraza a la niña
15	Locución adverbial			25	Tjgt1y3	Toma juguete 1 y 3
16	Nombre propio			26	Jgjgt1y3	Juega con juguete 1 y 3
				27	Dppl	Deja el papel
				28	Aphdl	Apunta hacia delante
				29	Aphjgt3	Apunta hacia juguete 3
				30	Mvnñ	Mueve la niña
				31	Cnt	Canta
				32	Tcnñ	Toca a niña
				33	Apsill	Apunta la silla
				34	Mvjgt1	Mueve juguete 1
				35	Mvjgt2	Mueve juguete 2
				36	Mvjgt3	Muve juguete 3
				37	Mdjgt1	Muerde juguete 1
				38	Mdjgt3	Muerde juguete 3
				39	Gpjgt1	Golpea juguete 1
				40	Gpjgt3	Golpea juguete 3
				41	Sltjgt1	Suelta juguete 1
				42	Sltjgt2	Suelta juguete 2
				43	Sltjgt3	Suelta juguete 3
				44	Lvjgt3	Levanta juguete 3
				45	Mvdohdl	Mueve dorso hacia delante
				46	MvdohMm	Mueve dorso hacia la madre
				47	GthMm	Gatea hacia la madre
				48	LvmMm	Levanta manos hacia la madre
				49	MvdohExñ	Mueve dorso hacia extraño
				50	AbMm	Abraza a la madre
				51	TmmMm	Toma mano de la madre
				52	Tcjgt2	Toca juguete 2
				53	Mvprn	Mueve pierna
				54	Gt	Gatea
				55	Tcjgt4	Toca juguete 4
				56	Jgjgt1y4	Juega con juguete 1 y 4
				57	Jgjgt4	Juega con juguete 4
				58	Apjgt3	Apunta juguete 3
				59	Tjgt1y3	Toma juguete 1 y 3

## Sheet: Cargiver Words & Grammar
Palabras sujeto 1
Uuuuu, el otro	13	5	7
Sentémosno	8
Quieres jugar, así mira	8	8	10	8
O con el avión, uuuu	11	12	5	5	13
¿Quieres o no?	8	11	10
Así mira, a ti que te gusta	10	8	12	6	11	6	8
Mira, tócalo	8	8
Ese otro	6	7
Tú, te toca a ti	6	6	8	12	6
Toma, te toca	8	6	8
Ahí lo tienes que poner. Yo te los paso	10	6	8	11	8	6	6	5	8
Yuuuu, ahí, ponelo ahí	13	10	8	10
El amarillo, y aquí otro, ponlos todos	5	9	11	10	7	8	5
.	1
.	1
.	1
.	1
.	1
.	1
.	1
Eso muy bien	12	10	10
.	1
.	1
.	1
.	1
.	1
.	1
.	1
.	1
.	1
.	1
.	1
.	1
Te gusta viste	10	8	8
.	1
.	1
¿Te gustó ese?	10	8	6
El cubo	5	7
El cubo verde	5	7	9
Ayy	13
.	1
.	1
.	1
.	1
Si te gustó ese	10	6	8	6
El círculo, círculo	5	7	7
.	1
.	1
.	1
.	1
.	1
.	1
.	1
.	1
.	1
.	1
.	1	1	1
Hola, bien gracias	13	10	8
.	1	1	1	1	1	1	1	1	1	1	1	1	1	1	1	1	1	1	1	1
Si, si	10	10
.	1	1	1	1	1	1
Ya	10
.	1	1	1	1	1	1	1	1	1	1	1
Aaa, ya.	13	10	1	1	1	1	1	1	1	1	1	1	1	1	1
.	1	1	1	1	1	1	1	1	1	1	1	1	1	1	1	1	1	1	1	1	1	1
Ya	10
Ya	1	1	1	1	1	1	1	1	1	1	1	1	1	1	1	1	1	1	1	1	1	1	1	1	1	1	1	1	1	1	1	10
.	1
.	1
.	1
Mmm, ya.	13	10
.	1	1	1
Mmm, no.	13	10
Era eso solamente	5	6	10
.	1	1	1
Va a cumplir un año en una semana más	8	12	8	5	7	12	5	5	10
.	1	1	1	1	1	1	1	1
Mmm, si	13	10
Lo terrible ahora es cuando… ya	5	9	10	11	10	10
…cuando está recién empezando a caminar	1	10	8	11	8	12	8
.	1	1	1	1	1	1	1
.	1	1	1
.	1
.	1	1	1	1
.	1	1	1	1	1	1
.	1	1	1	1
.	1	1	1	1	1
.	1	1	1	1
.	1
.	1	1	1	1
.	1
.	1	1	1	1	1
.	1
.	1
.	1	1	1
.	1
.	1
.	1
.	1	1	1
.	1	1	1	1
.	1	1	1	1	1	1
.	1
.	1
.	1	1	1	1	1
.	1	1	1	1
.	1	1	1
.	1	1	1	1	1
.	1	1	1	1
.	1
.	1
.	1	1
.	1	1	1	1	1	1	1	1
.	1	1
.	1
.	1
.	1	1
.	1
.	1
.	1
.	1
.	1
.	1
.	1
.	1
.	1
.	1
.	1
.	1
.	1
.	1
.	1
.	1
.	1
.	1
.	1
.	1	1
.	1	1	1
.	1
.	1	1
.	1
.	1
.	1
Florencia, hola	16	15
.	1
Oye, ¿cómo estai?	8	10	8
¿Con quien estai?	12	10	8
Venga mi cosita	8	6	7
.	1
Sigamos jugando	8	8
.	1
Ya	10
Upa, ya	13	10
¿A quién estas mirando?	12	10	8	8
Se va	6	8
Se fue	6	8
¿Quíen está ahí?, linda de la mamá	10	8	10	9	12	6	7
No hay nadie	10	8	7
.	1
La Florencia y la mamá	6	16	11	6	7
Juguemos de nuevo	8	12	10
.	1
¿Qué pasó?	10	8
No quiere estar más acá	10	8	8	10	10
Ya	10
¿Juguemos con este?	8	12	6
¿Te gusta este o no?	6	8	6	11	10
Azul	16
.	1
Golpéalo, golpéalo	8	8
.	1
.	1
Tú, toca tú	6	8	6
Eso	12
.	1
Que	10
.	1
Chocale, chocale	8	8
.	1
.	1
.	1
.	1
Ya	10
Tanta cosa	10	7
.	1
.	1
.	1
.	1
.	1
.	1
.	1
.	1
.	1
No quieres jugar más	10	8	8	11
Mira ¿quién es?	8	6	12
La mamá con la Flo	6	7	12	6	16
Vamos a buscar la jirafa	8	12	8	6	7
.	1
Vamos a buscar la jirafa que está allí	8	12	8	6	7	10	8	10
Mira	8
Vamos a buscar la jirafa	8	12	8	6	7
.	1
.	1
Mira	8
.	1
.	1
.	1
.	1
.	1
.	1
.	1
.	1
.	1
.	1
.	1
.	1
.	1
.	1	1
.	1
.	1	1
.	1	1	1	1
.	1
.	1
.	1
Venga para acá	8	12	10
.	1
.	1
.	1
Ya pasó	10	8
Nos vamos	6	8
Nos vamos, hola	6	8	13
Ya	10
Mira	8
.	1
Ya, ya	10	10
La Florencia, la Florencia, donde está, aquí está	6	16	6	16	10	8	10	8
En la casita, con la mamita y el papá	12	6	7	12	6	7	11	6	7
La Florencia, la Florencia, donde está, aquí está (Cnt	6	16	6	16	10	8	10	8
En la casita, con la mamita y el papá	12	6	7	12	6	7	11	6	7
.	1
¿Quieres jugar?, ¿quieres jugar?	8	8	8	8
Mmm, ya	13	10
.	1
Tome, tome	8	8
La jirafa, la jirafa	6	7	6	7
Como hace la jirafa	12	8	6	7
.	1
¿Quién esta ahí?	6	8	10
La Flo	6	16
¿Quién esta ahí?	6	8	10
La Flo	6	16
.	1
¿Quieres tomarlo?	8	8
.	1
.	1
.	1
Tómalo	8
Ya, que paso	10	10	8
Mira ¿quién esta ahí?	8	6	8	10
La Florencia Pascal	6	16	16
La Florencia Pascal	6	16	16
Si. No te lo eches a la boca	10	10	6	12	8	14	7
.	1
Que, no quieres que te lo saque	12	10	8	12	6	12	8
Esta sucio	6	9
¿Quieres otro juego?	8	12	7
Ya	9
Juguemos con el avión mira	8	12	5	7	8
.	1
Guuujuu	13
Guuujuu	13
.	1
Sentémosnos aquí	8	10
Florencia	16
¿Qué hay para allá?	10	8	12	10
¿Quieres ir para allá	6	8	12	10
.	1
.	1
¿Vamos?	8
Vamos a Cmr	8	12	8
Vamos Cmndo	8	8
Vamos de la manito	8	12	6	7

## Sheet:  Child Words & Grammar
Palabras sujeto 2 (N)
Llora reclamo	22	22
.	1
.	1	1	1	1
.	1	1	1	1	1
.	1	1	1
.	1	1	1	1	1	1	1
.	1	1
.	1	1
.	1	1	1	1	1
.	1	1	1
.	1	1	1	1	1	1	1	1	1
.	1	1	1	1
.	1	1	1	1	1	1	1
.	1
.	1
.	1
Balbucea "O"	34
Balbucea "Ee"	32
.	1
.	1
Grita "Aa"	31	31	31
.	1
.	1
.	1
.	1
Balnucea "Ee"	32
.	1
.	1
.	1
Balbucea "Ee"	32
.	1
.	1
.	1
.	1	1	1
.	1
.	1
.	1	1	1
Grita "Iii"	33	33
Grita "Iii"	33	33	33
.	1
Balbucea "Ee" (reclamo)	32
Grita "Eee"	42
.	1
.	1
.	1	1	1	1
.	1	1	1
.	1
.	1
.	1
.	1
.	1
.	1
.	1
.	1
.	1
.	1
.	1	1	1
.	1	1	1
.	1	1	1	1	1	1	1	1	1	1	1	1	1	1	1	1	1	1	1	1
.	1	1
.	1	1	1	1	1	1
.	1
.	1	1	1	1	1	1	1	1	1	1	1
.	13	10	1	1	1	1	1	1	1	1	1	1	1	1	1
.	1	1	1	1	1	1	1	1	1	1	1	1	1	1	1	1	1	1	1	1	1	1
.	1
.	1	1	1	1	1	1	1	1	1	1	1	1	1	1	1	1	1	1	1	1	1	1	1	1	1	1	1	1	1	1	1	1
.	1
.	1
Balbucea "Aa" (reclamo)	31
.	1	1
.	1	1	1
Balbucea "Ee"	32	32
.	1	1	1
.	1	1	1
.	1	1	1	1	1	1	1	1	1
.	1	1	1	1	1	1	1	1
.	1	1
.	1	1	1	1	1	1
.	1	1	1	1	1	1	1
.	1	1	1	1	1	1	1
.	1	1	1
Balbucea "Aa"	31
.	1	1	1	1
.	1	1	1	1	1	1
.	1	1	1	1
.	1	1	1	1	1
.	1	1	1	1
Balbucea "Ii"	33
.	1	1	1	1
.	1
.	1	1	1	1	1
.	1
.	1
.	1	1	1
.	1
.	1
.	1
.	1	1	1
.	1	1	1	1
.	1	1	1	1	1	1
.	1
Grita "Iii"	43
.	1	1	1	1	1
.	1	1	1	1
.	1	1	1
.	1	1	1	1	1
.	1	1	1	1
Grita "Iii"	43
Llora	21
.	1	1
.	1	1	1	1	1	1	1	1
.	1	1
.	1
.	1
Grita "Aa" (reclamo)	41	41
.	1
.	1
.	1
.	1
.	1
.	1
Balbucea "Aa"	31
.	1
.	1
Balbucea "Ee"	32
Balbucea "Aa"	31
.	1
Balbucea "Ee"	32
.	1
.	1
Balbucea "Ee"	32
.	1
.	1
.	1
Llora	21	21
.	1	1	1
.	1
Grita "Iii"	43	1
.	1
Llora	21
.	1
.	1	1
Grita "Ii" (contenta)	43
.	1	1	1
.	1	1	1
.	1	1	1
.	1
.	1	1
.	1
Balbucea "Ii"	33
.	1	1
.	1	1	1	1
.	1	1
.	1	1
.	1	1	1	1	1	1	1
.	1	1	1
.	1
.	1	1	1	1	1
.	1	1	1
Balbucea "Aa"	31
Grita "Aa"	41	1
.	1	1	1	1	1
.	1
.	1	1	1
.	1	1	1	1	1
.	1
.	1
.	1	1
.	1
.	1
.	1	1	1
Grita "Ee"	42
Llora	21
.	1
.	1
.	1	1
.	1
Llora	21
.	1
.	1
.	1
.	1	1
Grita "Iii"	43
.	1
.	1
Llora	21
.	1
.	1
.	1
.	1
Llora más fuerte	23
.	1	1	1	1
.	1	1	1
.	1	1	1	1	1
.	1	1	1	1	1
Llora	21
.	1	1	1	1	1	1	1	1
.	1
.	1	1	1	1	1
Grita "Ii"	43
Llora	21
.	1
.	1
Llora	2
.	1
.	1
Llora más fuerte	23
.	1
.	1
Llora más fuerte	23
.	1
.	1
.	1
.	1
.	1
.	1	1
Llora más fuerte	23
.	1	1
.	1	1	1	1
Llora más fuerte	23
.	1
.	1
.	1	1	1
.	1
Llora más fuerte	23
.	1
.	1	1
.	1	1
.	1	1	1
.	1
Llora más fuerte	23
.	1
.	1	1
.	1	1	1	1	1	1	1	1
.	1	1	1	1	1	1	1	1	1
.	1	1	1	1	1	1	1	1
.	1	1	1	1	1	1	1	1	1
.	1
.	1	1	1	1
.	1	1
.	1
Llora	21	1
.	1	1	1	1
.	1	1	1	1
Grita "Aa"	41
.	1	1	1
.	1	1
.	1	1	1
.	1	1
.	1
.	1	1
.	1
Llora	21
.	1
.	1
.	1	1	1
.	1	1	1	1
.	1	1	1
.	1	1	1
.	1	1	1	1	1	1	1
Llora	21
.	1	1	1	1	1	1	1
.	1	1
.	1	1	1
.	1
.	1	1	1	1	1
.	1
.	1
.	1
.	1
.	1	1
.	1
.	1	1	1	1
.	1	1	1	1
.	1
Balbucea "Ee"	32
.	1
.	1	1	1
.	1	1
.	1	1	1	1

## Sheet: Stranger Words & Grammar
Palabras sujeto 3
.	1	1	1
.	1
.	1	1	1	1
.	1	1	1	1	1
.	1	1	1
.	1	1	1	1	1	1	1
.	1	1
.	1	1
.	1	1	1	1	1
.	1	1	1
.	1	1	1	1	1	1	1	1	1
.	1	1	1	1	1
.	1	1	1	1	1	1	1
.	1
.	1
.	1
.	1
.	1
.	1
.	1
.	1	1	1
.	1
.	1
.	1
.	1
.	1
.	1
.	1
.	1
.	1
.	1
.	1
.	1
.	1	1	1
.	1
.	1
.	1	1	1
.	1	1
.	1	1	1
.	1
.	1
.	1
.	1
.	1
.	1	1	1	1
.	1	1	1
.	1
.	1
.	1
.	1
.	1
.	1
.	1
.	1
.	1
.	1
Hola, ¿cómo está?	13	10	8
.	1	1	1
Bueno yo soy Camila, la persona extraña. No sé si Carla le había comentado que iba a entrar una persona desconocida	10	6	8	16	6	7	9	10	8	10	12	8	8	10	8	12	8	6	7	9
.	1	1
Bueno yo voy hacer ese papel	10	6	8	8	6	7
.	1
Nosotros funcionamos con golpes en el espejo para saber cuando viene cada parte	6	8	12	7	14	7	12	8	10	8	15
Entonces cuando se escucharon esos golpecitos me indicaba a mí que yo debía empezar a hablarle	11	10	6	8	7	6	8	12	6	10	6	8	8	12	8
Ya. Luego va a sonar otro golpe que me va indicar a mí que yo tengo que bajar a jugar con la niña.	10	15	8	12	8	10	7	10	6	8	12	8	10	6	8	10	8	12	8	12	6	7
Ya	10
Después cuando yo esté jugando con la niña, van a sonar dos golpes, seguidos, que le van a indicar a usted que tiene que retirarse lo más sigilosamente luego de la sala.	15	10	6	8	8	12	6	7	8	12	8	10	7	15	10	12	8	12	8	12	6	10	8	10	8	12	11	9	15	12	6	7
.	1
.	1
.	1
Eso es	12	11
¿Tiene alguna duda?	8	9	7
.	1	1
.	1	1	1
¿Qué edad tiene?	10	7	8
.	1	1	1	1	1	1	1	1	1
Aaa ya, pero esta casi en el año	13	10	11	8	15	12	12	7
.	1
Ahora voy a verla	15	8	12	8	1	1
.	1	1	1	1	1	1	1
Ahora necesito que usted esté en silencio	15	8	10	6	8	12	7
Hola, ¿cómo estás?	13	10	8
.	1
Hola preciosa, ¿quieres jugar?	13	9	8	8
Mira, ¿quieres jugar con la jiraja?	8	8	8	12	6	7
¿Juguemos con la jirafa?	8	12	6	7
¿Quieres jugar con la jirafa?	8	8	12	6	7
Mira, los ponemos aquí	8	12	8	10
.	1
Mira, pongamos esto acá	8	8	10	10
.	1
Mira, si, pone este tú	8	10	8	6	6
.	1
Ahí	10
Listo, muy bien	15	10	10
Viste	8
.	1
.	1
Pongamos estp acá	8	10	10
Oye, Pongamos esto aquí	8	8	10	10
No quieres jugar con el avión	10	8	8	12	6	7
Juguemos con el avión	1
.	1
¿Quieres jugar con el avioncito?	8	8	12	6	7
¿O con la jirafita?	11	12	6	7
Te gusto esta	6	8	6
Oye Flo, sentémonos a jugar	8	16	8	12	8
Sentémonos aquí a jugar	8	10	12	8
Ahí	10
.	1
Ahí mira	10	8
No con la jirafita, ¿y con el avioncito?	10	12	6	7	11	12	6	7
¿Pongámoslo?, mira	8	8
.	1
.	1
Ponlo tú	8	6
Ahí	10
.	1
.	1
.	1
.	1
.	1
.	1
.	1
.	1
.	1
.	1
.	1
.	1
.	1
.	1
.	1
.	1
.	1
.	1
¿Qué pasó?	10	8
¿Te lo paso?	6	6	8
.	1
Ahí están	10	8
.	1
.	1
.	1
.	1	1
.	1
.	1	1	1
.	1	1	1
.	1	1	1
.	1
.	1	1
.	1
.	1
.	1	1
.	1	1	1	1
.	1	1
.	1	1
.	1	1	1	1	1	1	1
.	1	1	1
.	1
.	1	1	1	1	1
.	1	1	1
.	1
.	1	1
.	1	1	1	1	1
.	1
.	1	1	1
.	1	1	1	1	1
.	1
.	1
.	1	1
.	1
.	1
.	1	1	1
.	1
.	1
.	1
.	1
.	1	1
.	1
.	1
.	1
.	1
.	1
.	1	1
.	1
.	1
.	1
.	1
.	1
.	1
.	1
.	1
.	1
.	1	1	1	1
.	1	1	1
.	1	1	1	1	1
.	1	1	1	1	1
.	1
.	1	1	1	1	1	1	1	1
.	1
.	1	1	1	1	1
.	1
.	1
.	1
.	1
.	1
.	1
.	1
.	1
.	1
.	1
.	1
.	1
.	1
.	1
.	1
.	1
¿Qué pasó?	10	8
.	1
Ya, ya	10	10
Juguemos con la jirafa	8	12	6	7
.	1
.	1
.	1
.	1	1	1
.	1
.	1
.	1
.	1	1
.	1	1
.	1	1	1
.	1
.	1
.	1
.	1	1
.	1	1	1	1	1	1	1	1
.	1	1	1	1	1	1	1	1	1
.	1	1	1	1	1	1	1	1
.	1	1	1	1	1	1	1	1	1
.	1
.	1	1	1	1
.	1	1
.	1
.	1	1
.	1	1	1	1
.	1	1	1	1
.	1
.	1	1	1
.	1	1
.	1	1	1
.	1	1
.	1
.	1	1
.	1
.	1
.	1
.	1
.	1	1	1
.	1	1	1	1
.	1	1	1
.	1	1	1
.	1	1	1	1	1	1	1
.	1
.	1	1	1	1	1	1	1
.	1	1
.	1	1	1
.	1
.	1	1	1	1	1
.	1
.	1
.	1
.	1
.	1	1
.	1
.	1	1	1	1
.	1	1	1	1
.	1
.	1
.	1
.	1	1	1
.	1	1
.	1	1	1	1

## Sheet: Body Movements Caregiver
Movimientos sujeto 1
.	1
Tjgt1	2
Tjgt2	3
Tjgt3	4
.	1
.	1
Tjgt3	4
.	1
.	1
.	1
Tjgt3	4
Tjgt3	4
.	1
Tjgt4	5
Slv	7
Ssnt	8
Tppl	6
Mvm	9
Mvbr	10
.	1
Mvcbnñ	11
.	1
.	1
.	1
.	1
.	1
.	1
.	1
.	1
.	1
.	1
.	1
Mvcbnñ	11
Snr	12
.	1
.	1
.	1
.	1
.	1
MvcbExñ	13
.	1
.	1
.	1
.	1
.	1
.	1
.	1
Slv	7
Sagch	14
Tjgt3	4
Slv	7
Ssnt	8
.	1
.	1
.	1
.	1
.	1
.	1
.	1
Ascb	15
.	1
.	1
.	1
Ascb	15
.	1
.	1
.	1
.	1
.	1
.	1
Ascb	15
.	1
.	1
Tmmnñ	16
.	1
Tmnñ	17
.	1
.	1
.	1
.	1
.	1
.	1
.	1
.	1
.	1
.	1
.	1
.	1
.	1
.	1
.	1
.	1
.	1
.	1
.	1
.	1
.	1
Slv	7
Cm	18
.	1
SLsal	19
.	1
.	1
.	1
.	1
.	1
.	1
.	1
.	1
.	1
.	1
.	1
.	1
.	1
.	1
.	1
.	1
.	1
.	1
.	1
.	1
.	1
.	1
.	1
.	1
.	1
.	1
.	1
.	1
.	1
.	1
.	1
.	1
.	1
.	1
.	1
.	1
.	1
.	1
.	1
Etrsal	20
Cm	18
.	1
Cm	18
Sagch	14
Tmnñ	17
Bsnñ	21
.	1
Bsnñ	21
Stnñ	22
Ssnt	8
Bsnñ	21
.	1
Tccbnñ	23
Snr	12
.	1
.	1
Tmnñ	17
Bsnñ	21
.	1
Stnñ	22
Abnñ	24
Tmnñ	17
Tjgt1y3	25
Jgjgt1y3	26
.	1
.	1
Jgjgt1y3	26
.	1
Tjgt2	3
Tjgt3	4
Jgjgt1y3	26
Stnñ	22
Tmnñ	17
.	1
Tjgt3	4
.	1
.	1
Stnñ	22
Bsnñ	21
Tmnñ	17
Abnñ	24
.	1
Tmnñ	17
Tmmnñ	16
Cm	18
Tppl	6
Dppl	27
Sagch	14
Bsnñ	21
Tmnñ	17
Tccbnñ	23
.	1
Aphdl	28
.	1
Aphjgt3	29
Tccbnñ	23
.	1
Aphjgt3	29
Stnñ	22
.	1
Cm	18
Aphjgt3	29
Tjgt3	4
.	1
Slv	7
Stnñ	22
.	1
Cm	18
SLsal	19
.	1
.	1
.	1
.	1
.	1
.	1
.	1
.	1
.	1
.	1
.	1
Etrsal	20
Cm	18
.	1
Sagch	14
Tmnñ	17
Bsnñ	21
.	1
.	1
.	1
.	1
.	1
Abnñ	24
.	1
Mvnñ	30
Cnt	31
Tcnñ	32
Cnt	31
Bsnñ	21
.	1
Sagch	14
Tjgt3	4
.	1
Cnt	31
.	1
.	1
Aphdl	28
Snr	12
.	1
Snr	12
.	1
Aphjgt3	29
Sagch	14
Stnñ	22
Tjgt3	4
Sagch	14
Tmnñ	17
.	1
.	1
Mvnñ	30
.	1
.	1
.	1
.	1
.	1
Sagch	14
Tjgt2	3
Slv	7
.	1
.	1
Cm	18
Ssnt	8
.	1
.	1
Apsill	33
Mvjgt2	35
.	1
Sljgt2	42
.	1
Stnñ	22
Cm	18

## Sheet: Body Movements Child
Movimientos sujeto 2
.	1
.	1
.	1
.	1
.	1
.	1
.	1
.	1
.	1
Tjgt3	4
.	1
.	1
Tjgt3	4
.	1
Tjgt3	4
Mdjgt3	38
.	1
Mvjgt3	38
Mdjgt3	38
Gpjgt3	40
Snr	12
Sltjgt3	43
Tjgt3	4
.	1
Gpjgt3	40
Mdjgt3	38
Gpjgt3	40
Mdjgt3	38
Mdjgt3	38
Gpjgt3	40
Lvjgt3	44
Sltjgt3	43
Gpjgt1	38
Snr	12
Sltjgt3	43
.	1
.	1
.	1
.	1
MvcbExñ	13
.	1
Mvdohdl	45
Sltjgt1	41
Tjgt3	4
Lvjgt3	44
.	1
Sltjgt3	43
.	1
.	1
Mdjgt3	38
.	1
.	1
Mvjgt3	36
Lvjgt3	44
Sltjgt3	43
.	1
.	1
.	1
.	1
.	1
.	1
.	1
.	1
.	1
.	1
.	1
MvdohMm	46
GthMm	47
.	1
.	1
.	1
.	1
LvmMm	48
.	1
.	1
Slv	7
.	1
.	1
.	1
.	1
.	1
.	1
Snr	12
.	1
.	1
.	1
Tjgt3	4
.	1
.	1
.	1
Jgjgt3	60
.	1
Tjgt3	4
Jgjgt3	60
.	1
Mvdohdl	45
.	1
.	1
.	1
.	1
.	1
.	1
Snr	12
Sltjgt3	43
Tjgt3	4
.	1
.	1
.	1
.	1
Tjgt1	2
.	1
Tjgt3	4
.	1
.	1
.	1
.	1
.	1
.	1
Tjgt3	4
.	1
MvdohExñ	49
Jgjgt1y3	26
Sltjgt1	41
Jgjgt3	60
Tcjgt4	55
Tjgt4	5
Jgjgt1y4	56
Jgjgt4	57
MvdohExñ	49
Tjgt3	4
Apydosl	61
Mvprn	53
Gt	54
.	1
.	1
.	1
.	1
.	1
.	1
.	1
.	1
.	1
Mvbr	10
Snr	12
Mvbr	10
Snr	12
AbMm	50
Sltjgt3	43
.	1
.	1
AbMm	50
.	1
.	1
.	1
Snr	12
.	1
.	1
.	1
.	1
.	1
AbMm	50
.	1
Snr	12
.	1
.	1
.	1
Tjgt3	4
Jgjgt1y3	26
Tjgt1y3	25
.	1
Tjgt3	4
Jgjgt1y3	26
.	1
Sltjgt3	43
.	1
.	1
Sltjgt1	41
Tjgt3	4
.	1
.	1
.	1
AbMm	50
Mvbr	10
.	1
TmmMm	51
Cm	18
.	1
.	1
.	1
.	1
.	1
.	1
Mdjgt3	38
.	1
Mdjgt3	38
.	1
.	1
.	1
.	1
Slv	7
.	1
Cm	18
.	1
.	1
.	1
Cm	18
.	1
.	1
.	1
.	1
Tcjgt2	52
.	1
.	1
.	1
.	1
.	1
.	1
Slv	7
.	1
.	1
Mvbr	10
.	1
.	1
Cm	18
.	1
.	1
.	1
.	1
.	1
.	1
.	1
.	1
AbMm	50
.	1
.	1
.	1
.	1
.	1
.	1
.	1
.	1
.	1
Tjgt3	4
.	1
.	1
Mvbr	10
.	1
Snr	12
.	1
Snr	12
.	1
.	1
.	1
Slv	7
.	1
.	1
.	1
.	1
	1
Mdjgt3	38
.	1
.	1
.	1
.	1
.	1
.	1
.	1
Snr	12
.	1
.	1
.	1
Ssnt	8
.	1
.	1
.	1
.	1
.	1
Mdjgt3	38
.	1
Slv	7
Cm	18

## Sheet: Body Movements Stranger
Movimientos sujeto 3
.	1
.	1
.	1
.	1
.	1
.	1
.	1
.	1
.	1
.	1
.	1
.	1
.	1
.	1
.	1
.	1
.	1
.	1
.	1
.	1
.	1
.	1
.	1
.	1
.	1
.	1
.	1
.	1
.	1
.	1
.	1
.	1
.	1
.	1
.	1
.	1
.	1
.	1
Etrsal	20
Ssnt	8
.	1
.	1
.	1
.	1
.	1
.	1
Mvbr	10
.	1
.	1
.	1
.	1
.	1
.	1
.	1
.	1
.	1
.	1
Snr	12
.	1
.	1
.	1
.	1
.	1
.	1
Mvm	9
Mvnñ	30
.	1
Mvm	9
MvdohMm	46
.	1
Ascb	15
.	1
.	1
.	1
.	1
.	1
.	1
.	1
Slv	7
Dppl	27
Sagch	14
.	1
.	1
Tcjgt4	55
Tjgt3	4
.	1
.	1
Tjgt3	4
.	1
Tjgt3	4
.	1
Tjgt3	4
.	1
.	1
Snr	12
.	1
Tcnñ	32
.	1
.	1
Tjgt3	4
.	1
.	1
.	1
Tcnñ	32
.	1
Aphjgt3	29
.	1
Tmnñ	17
Stnñ	22
Tjgt3	4
Jgjgt3	60
Tjgt2	3
Tjgt3	4
Jgjgt3	60
.	1
.	1
Sltjgt3	43
Slv	7
Cm	18
Ssnt	8
.	1
Mvbr	10
.	1
.	1
.	1
.	1
.	1
.	1
.	1
.	1
.	1
.	1
.	1
Slv	7
Cm	18
Tmnñ	17
Stnñ	22
Tjgt3	4
Tjgt1y3	25
Slv	7
Cm	18
Ssnt	8
.	1
.	1
.	1
.	1
.	1
.	1
Dppl	27
.	1
Slv	7
Cm	18
SLsal	19
.	1
.	1
.	1
.	1
.	1
.	1
.	1
.	1
.	1
.	1
.	1
.	1
.	1
.	1
.	1
.	1
.	1
.	1
.	1
.	1
.	1
.	1
.	1
.	1
.	1
.	1
.	1
.	1
.	1
.	1
.	1
.	1
.	1
.	1
.	1
.	1
.	1
.	1
.	1
.	1
.	1
.	1
.	1
.	1
.	1
.	1
.	1
.	1
.	1
.	1
.	1
.	1
.	1
.	1
.	1
.	1
.	1
.	1
.	1
Etrsal	20
.	1
Cm	18
Sagch	14
Tmnñ	17
.	1
Tjgt3	4
Abnñ	24
.	1
.	1
.	1
.	1
	1
Ssnt	8
.	1
.	1
.	1
.	1
.	1
.	1
.	1
Slv	7
Cm	18
SLsal	19
.	1
.	1
.	1
.	1
.	1
.	1
.	1
.	1
.	1
.	1
.	1
.	1
.	1
.	1
.	1
.	1
.	1
.	1
.	1
.	1
.	1
.	1
.	1
.	1
.	1
.	1
.	1
.	1
.	1
.	1
.	1
.	1
.	1
.	1
.	1
.	1
.	1
.	1
.	1
.	1
.	1
.	1
.	1
.	1
.	1
