# Supplementary material for: Categorical Cross‐Recurrence Quantification Analysis Applied to Communicative Interaction during Ainsworth’s Strange Situation
Source: Hindawi journal article supplement (doi:10.1155/2018/4547029), 2018-01-01
Supplement: f1 [file 4547029.f1.zip › 4547029.f1/Video 1/Words V1/Original_Words_Ca_V1.txt]

1
2
3
4
5
6
7
8
9
10
2
11
1
12
9
13
7
8
14
15
16
17
18
8
19
20
3
21
17
22
14
15
23
17
22
24
25
26
16
27
28
17
29
30
31
24
32
24
2
33
34
35
3
36
37
38
38
38
38
39
40
41
38
38
38
38
38
17
18
42
38
43
44
45
2
46
2
46
47
48
38
38
38
49
17
44
20
2
50
50
38
38
38
38
51
41
52
38
38
38
38
38
38
38
38
38
38
38
38
38
38
38
38
38
38
38
38
38
49
49
38
38
38
38
38
38
53
38
38
38
38
38
38
38
38
38
38
38
38
38
54
53
38
38
38
38
38
38
38
38
38
38
38
38
38
38
38
38
38
38
38
38
38
38
38
38
38
38
38
38
38
38
38
38
38
38
38
38
38
53
38
38
38
38
38
38
38
38
38
38
38
38
38
38
38
38
38
38
38
38
38
38
38
38
38
38
38
38
38
38
38
53
38
38
55
53
38
38
38
55
56
57
39
58
38
38
38
59
14
60
61
62
63
64
65
66
38
38
38
38
38
38
38
38
55
49
25
67
68
69
70
38
53
38
70
71
72
73
14
74
38
38
38
38
38
38
38
38
38
38
38
38
38
38
38
38
38
38
38
38
38
38
38
38
38
38
38
38
38
38
38
38
38
38
38
38
38
38
38
38
38
38
38
38
38
38
38
38
38
38
38
38
38
38
38
38
38
38
38
38
38
38
38
38
38
38
38
38
38
38
38
38
38
38
38
38
38
38
38
38
38
38
38
38
38
38
38
38
38
38
38
38
38
38
38
38
38
38
38
38
38
38
38
38
38
38
38
38
38
38
38
38
38
38
38
38
38
38
38
38
38
38
38
38
38
38
38
38
38
38
38
75
51
38
76
77
78
79
80
78
81
82
83
38
84
85
38
53
86
53
87
88
89
90
91
59
91
92
93
71
94
95
96
97
98
56
99
100
38
97
75
34
97
98
101
96
102
38
103
104
56
105
106
66
107
53
108
10
109
43
18
110
9
13
111
38
112
112
38
21
22
21
39
38
16
38
113
113
38
38
38
53
114
115
38
38
38
38
38
38
56
5
6
66
8
116
117
97
98
10
97
118
119
14
120
97
121
38
119
14
120
97
121
16
71
122
8
119
14
120
97
121
38
38
8
38
38
38
38
38
38
38
38
38
38
38
38
38
38
38
38
38
38
81
123
107
38
38
38
53
124
125
119
125
119
51
53
8
38
53
53
97
75
97
75
126
71
35
71
63
97
127
10
97
128
34
2
129
97
75
97
75
126
71
35
71
63
97
127
10
97
128
34
2
129
38
12
130
12
130
55
53
38
131
131
97
121
97
121
132
133
97
121
38
116
134
94
97
118
116
134
94
97
118
38
12
135
38
38
38
136
53
16
30
8
116
71
94
97
75
137
97
75
137
49
56
17
25
138
14
97
139
38
16
56
5
16
17
25
140
110
141
12
3
142
53
101
10
2
11
8
38
143
143
38
144
35
75
103
99
123
145
12
146
123
145
38
38
147
119
14
74
119
148
119
96
97
149
