# Supplementary material for: Categorical Cross‐Recurrence Quantification Analysis Applied to Communicative Interaction during Ainsworth’s Strange Situation
Source: Hindawi journal article supplement (doi:10.1155/2018/4547029), 2018-01-01
Supplement: f1 [file 4547029.f1.zip › 4547029.f1/Video 1/Words V1/Original_Words_Ch_V1.txt]

151
151
151
38
38
38
38
38
38
38
38
38
38
38
38
38
38
38
38
38
38
38
38
38
38
38
38
38
38
38
38
38
38
38
38
38
38
38
38
38
38
38
38
38
38
38
38
38
38
38
38
38
38
38
38
38
152
153
38
154
154
154
38
153
38
153
38
38
38
38
38
38
38
38
155
155
155
155
155
38
153
156
38
38
38
38
38
38
38
38
38
38
38
38
38
38
38
38
38
38
38
38
38
38
38
38
38
38
38
38
38
38
38
38
38
38
38
38
38
38
38
38
38
38
38
38
38
38
38
38
38
38
38
38
38
38
38
38
38
38
38
38
38
38
38
38
38
38
38
38
38
38
38
38
38
38
38
38
38
38
38
38
38
38
38
38
38
38
38
38
38
38
38
38
38
38
38
38
38
38
38
38
38
38
38
38
38
38
38
38
38
38
38
38
38
38
38
38
38
38
38
38
38
38
38
38
38
38
38
38
38
38
38
157
38
38
38
38
38
153
153
38
38
38
38
38
38
38
38
38
38
38
38
38
38
38
38
38
38
38
38
38
38
38
38
38
38
38
38
38
38
38
38
38
38
38
38
38
38
38
38
38
38
38
38
38
38
38
38
38
157
38
38
38
38
38
38
38
38
38
38
38
155
159
38
38
38
38
38
38
38
38
38
38
158
38
38
38
38
38
38
38
38
38
38
38
38
38
38
38
38
38
38
38
38
38
38
38
159
159
38
38
38
38
38
155
155
38
38
155
38
38
38
38
38
38
38
38
38
38
38
38
38
38
38
38
38
38
38
38
38
155
159
38
38
38
38
38
38
38
38
38
38
38
38
38
154
154
154
38
38
157
38
153
157
38
153
38
153
38
159
38
38
38
38
38
155
155
38
159
38
38
38
155
38
38
38
38
38
38
38
38
38
38
159
38
38
158
38
38
38
38
38
38
38
38
38
38
38
38
38
38
38
38
38
38
38
38
38
38
38
38
38
38
38
38
159
157
154
154
38
38
38
38
38
38
38
38
38
38
38
38
38
38
38
38
38
38
38
38
38
38
156
159
38
38
38
38
38
159
38
38
38
38
155
38
159
38
160
38
38
38
38
38
38
38
38
38
38
38
38
38
38
38
38
38
38
159
38
38
38
38
38
38
38
38
38
38
38
38
38
38
155
159
38
38
159
38
160
38
160
38
38
38
160
38
38
38
38
38
38
160
38
38
38
38
38
160
38
38
38
38
38
38
38
38
38
159
38
38
38
38
38
38
38
38
38
38
38
38
38
38
38
38
38
38
38
38
38
38
38
38
38
38
38
38
38
38
38
38
38
38
38
38
38
38
38
38
38
38
38
38
38
38
38
38
38
38
38
38
38
38
38
154
38
38
38
38
38
38
38
38
38
38
38
38
38
38
159
38
38
38
38
38
38
38
38
38
38
38
38
38
38
38
38
38
38
38
38
38
38
38
159
38
38
38
38
38
38
38
38
38
38
38
38
38
38
38
38
38
38
38
38
38
38
38
38
38
38
38
38
38
38
38
38
38
38
153
38
38
38
38
38
38
38
38
38
38
