# Supplementary material for: Categorical Cross‐Recurrence Quantification Analysis Applied to Communicative Interaction during Ainsworth’s Strange Situation
Source: Hindawi journal article supplement (doi:10.1155/2018/4547029), 2018-01-01
Supplement: f1 [file 4547029.f1.zip › 4547029.f1/Video 1/Words V1/Original_Words_St_V1.txt]

38
38
38
38
38
38
38
38
38
38
38
38
38
38
38
38
38
38
38
38
38
38
38
38
38
38
38
38
38
38
38
38
38
38
38
38
38
38
38
38
38
38
38
38
38
38
38
38
38
38
38
38
38
38
38
38
38
38
38
38
38
38
38
38
38
38
38
38
38
38
38
38
38
38
38
38
38
38
38
38
38
38
38
38
38
38
38
38
38
38
38
51
77
161
38
38
38
162
28
163
164
97
165
166
56
167
49
168
169
170
171
16
172
14
173
64
165
174
38
38
162
28
175
176
20
177
38
178
179
10
180
63
2
181
123
182
70
183
184
185
186
70
91
187
188
189
190
191
14
192
16
28
193
194
14
195
53
196
59
14
197
3
198
16
190
59
199
14
192
16
28
200
16
201
14
6
10
97
202
53
203
70
28
204
85
10
97
202
205
14
197
206
180
207
16
169
205
14
199
14
208
16
209
16
210
25
66
211
196
96
97
212
38
38
39
69
213
214
215
38
38
38
38
38
103
216
217
38
38
38
38
38
38
38
38
38
54
53
218
71
219
63
2
62
38
38
68
175
14
220
38
38
38
38
38
38
38
38
38
38
68
221
16
208
204
63
222
51
77
223
38
51
224
12
130
8
12
6
10
97
225
108
10
97
225
12
6
10
97
225
8
29
226
35
38
8
227
228
107
38
8
49
229
110
21
38
24
230
40
41
42
38
227
228
107
76
227
228
35
56
5
6
10
2
11
101
10
2
11
38
12
6
10
2
231
232
10
97
233
17
234
134
76
118
144
14
6
144
35
14
6
24
38
24
8
56
10
97
235
236
10
2
231
237
8
38
238
21
24
239
38
38
38
38
38
38
38
38
38
38
103
104
43
25
240
38
24
241
38
38
38
38
38
38
38
38
38
38
38
38
38
38
38
38
38
38
38
38
38
38
38
38
38
38
38
38
38
38
38
38
38
38
38
38
38
38
38
38
38
38
38
38
38
38
38
38
38
38
38
38
38
38
38
38
38
38
38
38
38
38
38
38
38
38
38
38
38
38
38
38
38
38
38
38
38
38
38
38
38
38
38
38
38
38
38
38
38
38
38
38
38
38
38
38
38
38
38
38
38
38
38
38
38
38
38
38
38
38
38
38
38
38
38
38
38
38
38
38
38
38
38
38
38
38
38
38
38
38
38
38
38
38
103
104
38
53
53
101
10
97
121
38
38
121
38
38
38
38
38
38
38
38
38
38
38
38
38
38
38
38
38
38
38
38
38
38
38
38
38
38
38
38
38
38
38
38
38
38
38
38
38
38
38
38
38
38
38
38
38
38
38
38
38
38
38
38
38
38
38
38
38
38
38
38
38
38
38
38
38
38
38
38
38
38
38
38
38
38
38
38
38
38
38
38
38
38
38
38
38
38
38
38
38
38
38
38
38
38
38
38
38
38
38
38
38
38
38
38
38
38
38
38
38
38
38
38
38
38
38
38
38
38
38
38
38
38
38
38
38
38
38
38
38
38
38
38
38
38
38
38
38
38
38
38
38
38
38
38
38
38
38
38
38
38
38
38
38
38
