# Supplementary material for: Categorical Cross‐Recurrence Quantification Analysis Applied to Communicative Interaction during Ainsworth’s Strange Situation
Source: Hindawi journal article supplement (doi:10.1155/2018/4547029), 2018-01-01
Supplement: f1 [file 4547029.f1.zip › 4547029.f1/Video 1/Words V1/Randomized_Words_Ca_V1.txt]

138
2
120
38
57
115
38
26
38
34
141
38
38
38
38
50
38
38
97
38
38
110
38
66
77
38
38
38
38
51
38
38
38
99
38
38
124
16
38
145
38
16
119
38
14
99
38
40
38
38
38
36
53
10
38
38
53
38
133
3
38
38
38
114
14
8
101
126
38
69
9
38
83
107
16
38
38
38
18
38
134
38
97
137
128
75
38
49
38
97
13
38
121
12
14
38
38
38
38
1
4
53
97
38
97
62
79
38
123
38
55
30
47
38
38
38
14
38
9
46
38
38
39
63
80
38
38
22
38
17
38
38
55
113
75
49
38
3
96
5
103
14
56
38
38
59
71
38
38
38
38
135
6
98
106
12
131
94
49
38
82
38
38
8
38
38
2
24
38
35
75
21
38
97
10
38
38
38
38
97
38
38
53
5
128
97
8
76
38
38
38
38
38
9
38
38
38
38
38
38
91
97
53
38
38
75
97
38
53
25
24
38
81
129
14
38
38
38
53
71
38
56
38
35
38
38
38
87
38
147
49
90
38
38
38
38
38
30
38
38
38
17
34
25
12
38
38
38
130
38
24
75
98
38
38
2
59
103
38
38
38
38
17
38
38
38
53
85
10
8
55
55
61
38
33
38
52
11
38
38
17
38
20
38
46
8
12
14
38
78
38
38
145
120
123
38
38
38
121
38
38
121
38
38
38
38
38
10
38
38
56
38
38
12
38
42
129
32
38
39
75
38
38
17
38
17
38
38
100
74
94
38
149
38
112
66
45
38
38
51
51
139
38
92
66
43
54
38
132
38
96
17
38
95
38
38
38
38
119
38
38
72
35
38
38
2
38
15
38
6
38
97
84
38
38
8
18
38
116
144
38
1
38
38
38
71
38
38
8
5
97
27
71
38
38
3
63
49
120
127
38
38
131
119
38
38
38
71
96
38
17
38
38
70
53
97
60
93
38
105
38
38
38
38
38
125
2
38
38
97
38
53
16
38
38
38
7
8
38
143
15
38
38
112
53
38
38
53
38
38
38
89
38
2
38
97
31
38
75
2
94
38
38
21
116
38
97
38
38
3
73
38
38
119
38
81
64
50
53
34
38
63
38
134
140
111
11
110
122
53
97
97
38
13
28
38
38
97
107
121
38
117
10
68
38
71
118
53
38
119
38
38
104
119
18
38
38
38
2
38
108
34
123
38
38
121
38
16
56
38
38
44
38
38
126
97
38
78
41
38
38
88
116
97
38
74
38
38
38
97
70
38
71
97
38
38
38
38
38
44
38
38
39
38
38
35
97
38
43
38
38
53
38
38
22
38
38
38
38
118
119
38
98
38
25
22
21
38
25
125
20
38
118
7
38
38
38
67
65
38
38
143
16
38
75
38
38
38
2
14
38
136
29
38
116
38
38
38
38
91
86
119
97
14
56
38
38
38
38
38
127
38
38
38
48
56
38
38
38
38
38
38
71
38
38
38
38
113
38
130
10
38
75
38
38
12
38
58
146
38
8
38
38
137
38
41
38
38
38
38
37
142
94
19
38
38
101
53
38
109
38
148
102
38
23
121
38
16
