# Supplementary material for: Categorical Cross‐Recurrence Quantification Analysis Applied to Communicative Interaction during Ainsworth’s Strange Situation
Source: Hindawi journal article supplement (doi:10.1155/2018/4547029), 2018-01-01
Supplement: f1 [file 4547029.f1.zip › 4547029.f1/Video 1/Words V1/Randomized_Words_Ch_V1.txt]

38
38
38
38
38
38
38
38
38
38
38
38
38
38
154
38
38
38
155
38
38
38
38
38
38
154
38
38
155
38
38
38
38
38
151
38
38
38
38
38
38
38
38
38
38
38
38
38
38
38
38
38
38
38
38
38
38
160
38
38
38
38
38
38
38
38
38
38
38
38
38
159
38
38
38
38
159
38
157
38
38
38
38
38
38
38
38
38
38
38
38
38
38
38
38
38
38
38
38
38
38
38
38
38
38
155
38
38
38
38
38
38
38
38
38
38
38
159
38
38
38
38
38
38
38
38
38
38
38
38
154
38
158
38
38
38
154
38
38
38
151
38
38
38
38
38
155
159
38
38
38
38
38
38
38
38
38
38
38
38
38
38
38
38
38
38
38
38
38
38
38
38
38
38
38
38
38
38
38
38
38
38
38
38
38
38
38
38
38
38
154
38
38
38
38
38
38
38
38
38
38
38
38
38
38
38
38
38
38
38
38
159
38
38
153
38
38
38
38
38
153
38
38
38
38
38
38
38
38
160
38
38
38
38
38
38
38
38
38
38
38
157
153
38
38
38
156
38
153
38
38
38
38
151
38
38
38
38
159
38
38
38
38
38
38
38
38
38
38
38
38
38
38
38
38
38
38
155
159
38
38
38
38
38
38
38
38
38
38
38
38
38
38
38
38
38
38
38
38
155
38
38
38
38
38
38
38
38
38
38
38
38
38
38
38
38
38
38
38
160
38
38
38
38
38
38
38
159
38
38
155
38
38
38
38
38
38
38
160
38
38
38
38
38
38
38
38
38
38
38
38
38
157
38
38
160
38
38
38
38
38
38
38
38
153
38
38
38
38
38
38
38
38
159
38
38
38
38
153
155
38
38
38
38
38
38
38
38
38
38
38
38
38
38
38
38
38
38
38
154
38
38
38
38
38
38
38
38
155
38
38
38
38
159
155
159
38
38
38
38
38
38
38
38
38
38
38
38
38
38
158
38
38
155
38
38
38
38
38
38
38
38
38
38
38
38
38
38
38
38
38
38
38
38
38
38
38
38
38
38
38
38
38
38
38
159
38
157
38
38
38
38
38
38
38
38
38
38
38
38
38
38
38
38
38
38
38
38
38
38
159
38
38
38
38
38
155
38
159
38
38
38
38
38
38
153
38
38
38
38
38
38
38
38
38
38
38
38
38
38
38
38
38
38
38
38
38
38
38
38
38
38
38
38
38
38
38
38
38
38
38
38
38
38
38
154
38
38
38
38
38
38
38
38
38
38
38
38
38
38
38
38
38
38
38
38
38
38
38
38
38
153
38
38
38
38
38
38
38
38
38
38
38
153
38
38
38
159
38
38
38
38
38
38
38
38
38
38
38
38
38
38
38
38
38
38
38
38
38
38
38
38
38
156
38
38
38
38
38
152
38
38
38
38
38
38
38
157
38
38
38
38
38
38
38
38
38
38
38
38
154
38
38
38
38
155
38
38
38
38
38
38
38
38
38
38
38
38
38
160
38
38
38
154
38
159
38
38
159
38
155
38
38
38
155
38
38
38
153
38
38
38
38
38
38
38
38
38
