# Supplementary material for: Categorical Cross‐Recurrence Quantification Analysis Applied to Communicative Interaction during Ainsworth’s Strange Situation
Source: Hindawi journal article supplement (doi:10.1155/2018/4547029), 2018-01-01
Supplement: f1 [file 4547029.f1.zip › 4547029.f1/Video 1/Words V1/Randomized_Words_St_V1.txt]

208
217
38
38
38
101
38
38
225
213
38
38
38
38
191
38
25
38
38
38
192
38
227
38
38
229
38
38
38
38
38
8
38
210
8
38
38
38
38
38
53
38
38
38
38
220
38
38
38
38
38
170
16
38
38
38
38
96
38
28
199
51
14
38
38
38
38
38
38
38
97
8
38
38
38
38
38
38
38
219
38
38
38
35
197
10
38
97
62
38
56
38
16
38
173
38
38
14
97
63
235
38
211
38
38
38
24
38
76
38
42
38
38
14
38
162
8
38
144
38
38
38
38
180
38
38
38
38
38
12
97
17
38
38
162
209
38
2
35
38
110
38
38
8
38
20
38
59
14
38
76
38
38
38
38
175
38
38
38
63
38
59
38
38
38
38
186
38
225
38
38
38
206
38
121
38
183
38
190
38
38
38
175
38
10
202
195
38
38
38
12
14
38
38
38
205
38
12
38
38
3
6
38
38
38
39
14
38
38
38
38
38
38
103
231
38
38
38
38
38
193
38
38
38
70
5
2
123
38
189
38
38
38
38
108
38
14
38
10
38
38
38
16
38
14
228
38
38
38
38
38
38
38
38
38
38
38
10
38
38
180
230
38
38
38
38
38
38
101
38
130
56
38
38
24
77
38
10
38
97
38
204
38
10
38
38
182
14
2
38
68
16
53
38
38
11
38
38
38
224
38
38
38
6
38
38
38
38
38
25
38
179
38
201
38
167
38
38
53
29
38
38
38
194
38
10
97
38
38
38
28
38
231
225
63
161
207
16
16
38
196
199
38
38
38
134
38
104
8
38
77
38
236
38
66
38
38
38
104
38
38
68
228
38
38
38
38
38
38
38
198
54
38
38
6
24
38
64
38
103
38
38
222
187
38
166
41
71
38
14
38
10
16
38
40
38
6
43
28
202
21
226
178
38
203
38
38
38
38
38
172
38
38
38
38
208
70
38
97
38
21
38
38
38
38
14
227
38
38
38
38
38
38
38
38
2
38
28
38
38
38
38
238
38
38
38
38
56
38
38
176
165
49
51
168
38
97
38
221
38
38
38
38
38
38
38
144
205
38
38
16
38
6
38
38
38
38
38
38
38
38
38
212
38
38
163
107
38
38
38
223
38
6
38
38
103
38
38
12
38
85
38
107
38
38
38
38
38
2
38
38
38
38
38
38
38
38
38
38
38
38
204
38
38
38
24
38
91
38
38
184
10
215
38
38
16
38
38
38
51
38
240
38
38
38
38
38
38
38
38
38
227
121
38
38
6
38
38
38
118
38
38
38
38
38
38
69
38
164
38
10
216
38
97
38
38
38
38
38
38
38
38
38
38
24
38
38
192
181
38
38
38
38
28
38
38
38
38
38
38
185
38
38
38
233
169
196
38
38
214
38
38
70
14
239
97
11
38
38
38
38
174
38
241
38
197
38
53
169
38
38
38
38
38
38
38
188
38
10
38
38
38
38
38
38
38
38
190
38
38
38
38
177
53
38
38
10
38
38
38
165
234
38
200
38
38
237
38
38
38
228
38
171
10
38
35
2
49
38
218
38
38
38
232
38
38
38
38
