# Supplementary material for: Categorical Cross‐Recurrence Quantification Analysis Applied to Communicative Interaction during Ainsworth’s Strange Situation
Source: Hindawi journal article supplement (doi:10.1155/2018/4547029), 2018-01-01
Supplement: f1 [file 4547029.f1.zip › 4547029.f1/Video 2/Body Movements V2/Original_BodyMov_Ca_V2.txt]

4
1
13
1
1
32
1
1
1
1
1
1
3
4
1
13
3
1
1
1
1
1
1
1
1
1
1
1
33
1
1
1
1
1
1
1
1
1
1
1
1
1
1
1
1
1
1
1
1
13
12
21
1
1
1
1
1
1
1
1
1
1
1
1
1
1
1
1
1
1
1
1
1
1
1
1
1
1
1
1
1
1
1
1
1
1
22
15
4
7
1
3
4
7
2
1
1
1
1
19
3
6
1
1
1
3
26
1
19
1
8
19
1
1
18
1
1
1
3
1
18
1
4
7
1
1
1
13
12
21
1
1
1
1
1
22
18
19
26
1
24
19
1
26
4
7
1
2
5
1
1
1
19
26
18
4
7
1
3
5
1
8
1
1
1
6
18
1
4
7
1
2
5
18
1
