# Supplementary material for: Categorical Cross‐Recurrence Quantification Analysis Applied to Communicative Interaction during Ainsworth’s Strange Situation
Source: Hindawi journal article supplement (doi:10.1155/2018/4547029), 2018-01-01
Supplement: f1 [file 4547029.f1.zip › 4547029.f1/Video 2/Body Movements V2/Original_BodyMov_St_V2.txt]

1
1
1
1
1
1
1
1
1
1
1
1
1
1
1
1
1
1
1
1
22
12
17
14
1
1
1
1
24
1
31
1
1
1
1
1
1
15
1
2
1
11
1
5
1
11
1
1
1
1
1
1
13
12
17
14
1
1
1
16
13
15
4
1
28
13
12
14
1
1
1
1
1
1
13
15
18
18
1
2
5
13
12
14
17
1
1
1
13
12
21
1
1
1
1
1
1
1
1
1
1
1
1
1
1
1
1
1
1
1
1
1
1
1
1
1
1
1
1
1
1
1
1
1
1
1
1
1
1
1
22
1
18
1
19
1
13
14
13
21
1
1
1
1
1
1
1
1
1
1
1
1
1
1
1
1
1
1
1
1
1
1
1
1
1
1
1
1
1
1
1
1
1
1
1
