# Supplementary material for: Categorical Cross‐Recurrence Quantification Analysis Applied to Communicative Interaction during Ainsworth’s Strange Situation
Source: Hindawi journal article supplement (doi:10.1155/2018/4547029), 2018-01-01
Supplement: f1 [file 4547029.f1.zip › 4547029.f1/Video 2/Body Movements V2/Randomized_BodyMov_Ca_V2.txt]

1
1
1
1
26
1
1
1
1
1
26
1
1
3
1
1
13
1
1
1
1
13
26
1
1
22
1
19
2
3
12
18
19
1
18
3
1
22
21
1
1
1
1
1
1
19
1
1
2
1
1
1
1
1
1
13
1
1
8
1
1
1
19
1
18
3
1
1
3
4
1
1
4
1
33
1
1
1
1
1
1
1
1
1
1
1
1
1
1
1
1
3
1
18
1
1
1
1
1
1
5
1
1
1
1
1
1
8
7
1
1
1
4
4
12
4
4
1
1
4
7
1
7
1
1
7
1
1
26
1
1
6
1
1
1
7
1
1
19
1
1
1
1
4
1
3
32
1
18
1
1
19
1
1
1
1
1
2
1
13
5
7
1
1
1
24
1
6
1
1
21
18
5
15
1
