# Supplementary material for: Categorical Cross‐Recurrence Quantification Analysis Applied to Communicative Interaction during Ainsworth’s Strange Situation
Source: Hindawi journal article supplement (doi:10.1155/2018/4547029), 2018-01-01
Supplement: f1 [file 4547029.f1.zip › 4547029.f1/Video 2/Body Movements V2/Randomized_BodyMov_Ch_V2.txt]

1
4
7
4
4
2
1
1
1
1
3
4
7
1
1
1
4
1
1
1
4
6
1
1
3
1
1
1
5
1
1
1
1
1
1
1
6
1
1
1
25
1
1
1
27
1
1
1
1
1
1
1
2
1
1
1
7
1
1
1
1
1
1
9
1
7
1
1
1
1
1
7
1
1
1
1
1
1
1
1
4
1
13
1
1
1
1
1
1
1
1
1
1
30
7
1
1
1
3
9
1
1
1
5
1
1
25
1
1
1
4
1
23
1
24
1
1
1
4
1
1
1
1
1
29
1
32
1
1
30
1
7
12
1
1
7
1
1
1
1
1
20
1
1
1
5
12
24
1
1
1
1
1
1
1
1
1
1
1
1
1
2
1
20
1
1
1
1
4
1
1
10
12
1
1
