# Supplementary material for: Categorical Cross‐Recurrence Quantification Analysis Applied to Communicative Interaction during Ainsworth’s Strange Situation
Source: Hindawi journal article supplement (doi:10.1155/2018/4547029), 2018-01-01
Supplement: f1 [file 4547029.f1.zip › 4547029.f1/Video 2/Body Movements V2/Randomized_BodyMov_St_V2.txt]

1
1
13
1
1
1
1
1
19
1
21
1
1
1
1
1
1
1
1
11
13
1
1
22
1
1
14
1
12
17
1
1
1
14
31
1
1
1
1
1
1
1
1
1
1
1
1
21
16
2
18
1
1
1
1
1
1
1
1
1
1
1
1
1
1
13
2
1
1
1
1
1
1
1
15
1
1
17
1
1
1
1
1
12
1
1
1
1
18
1
14
14
1
22
1
1
1
1
1
1
1
13
1
15
12
11
1
1
1
1
1
1
1
1
1
1
1
1
1
1
17
1
1
1
12
1
14
1
1
1
1
1
1
1
5
13
1
1
15
13
1
1
4
12
1
1
18
1
1
1
1
1
1
28
1
1
1
1
1
1
1
1
1
1
1
1
24
13
1
1
5
1
13
1
1
