# Supplementary material for: Categorical Cross‐Recurrence Quantification Analysis Applied to Communicative Interaction during Ainsworth’s Strange Situation
Source: Hindawi journal article supplement (doi:10.1155/2018/4547029), 2018-01-01
Supplement: f1 [file 4547029.f1.zip › 4547029.f1/Video 2/Grammar Structure V2/Original_Grammar_Ca_V2.txt]

8
6
8
10
1
1
1
1
1
6
8
6
12
6
6
5
8
1
1
6
7
8
6
7
6
7
8
8
10
1
1
1
1
1
12
6
8
1
1
1
1
1
13
1
1
1
1
1
1
1
1
1
1
1
1
1
1
1
1
10
1
1
1
1
1
1
1
1
1
1
1
1
1
1
1
1
1
1
1
1
1
1
1
1
1
1
1
1
1
1
1
1
1
1
1
1
1
1
1
1
1
1
1
1
1
1
6
6
8
10
1
1
1
1
1
1
1
1
1
1
1
1
1
1
1
1
1
1
1
1
1
1
1
1
1
1
1
1
10
1
1
1
1
1
1
1
1
1
1
1
1
1
10
1
1
1
1
1
1
1
1
1
1
13
10
1
1
1
1
1
1
1
1
1
1
1
1
10
1
1
1
1
1
1
1
1
1
1
1
1
1
1
1
1
1
1
1
1
1
1
1
1
1
1
1
1
1
1
12
9
13
1
1
1
1
1
1
1
1
1
1
1
1
1
1
1
1
1
1
1
1
1
1
1
1
1
1
1
1
1
1
1
1
1
1
1
1
1
1
1
1
1
1
1
1
1
1
1
1
1
1
1
1
1
1
1
1
1
1
1
1
1
1
1
1
1
10
8
12
16
12
9
6
8
8
1
1
1
1
1
1
1
6
8
10
10
8
1
1
1
1
6
8
12
8
10
10
6
9
10
10
8
1
8
8
8
10
1
1
1
1
1
1
1
1
1
1
1
1
1
1
1
1
1
1
1
1
1
1
16
10
1
1
8
5
7
8
8
12
8
10
1
1
8
8
8
8
8
12
12
10
8
10
12
8
8
12
8
12
8
10
1
1
8
12
8
1
1
1
1
1
10
8
5
7
1
1
1
1
6
8
10
10
1
1
1
5
7
5
7
