# Supplementary material for: Categorical Cross‐Recurrence Quantification Analysis Applied to Communicative Interaction during Ainsworth’s Strange Situation
Source: Hindawi journal article supplement (doi:10.1155/2018/4547029), 2018-01-01
Supplement: f1 [file 4547029.f1.zip › 4547029.f1/Video 2/Grammar Structure V2/Original_Grammar_Ch_V2.txt]

1
1
1
1
1
31
32
1
32
31
31
31
1
1
1
1
1
1
33
1
1
1
1
1
1
1
1
1
1
1
31
33
1
33
1
1
1
1
1
1
1
1
1
1
1
1
1
1
1
1
1
1
1
1
1
1
1
1
1
1
1
1
1
1
1
1
1
1
1
1
1
1
1
1
1
1
1
1
1
1
1
1
1
1
1
1
1
1
1
1
1
1
1
1
1
1
1
1
1
1
1
1
1
1
1
1
1
1
1
1
1
1
1
1
1
1
1
1
1
1
1
1
1
1
1
1
1
1
1
1
1
1
1
1
1
1
1
1
1
1
1
1
1
1
1
1
1
1
1
1
1
1
1
1
1
1
1
1
1
1
1
1
1
1
1
1
1
1
1
1
1
1
1
1
1
1
1
1
1
1
1
1
1
1
1
1
1
1
1
1
1
1
1
1
1
1
1
1
1
1
1
1
1
1
1
1
1
33
1
1
1
33
1
1
1
1
1
1
1
1
1
1
1
1
1
1
1
1
1
1
1
1
1
1
1
1
1
1
1
1
1
1
1
1
1
1
1
1
1
1
1
1
1
1
21
23
1
1
1
1
1
1
1
1
1
1
1
1
1
21
1
21
1
23
1
21
42
42
1
1
1
1
1
1
21
1
21
1
23
1
21
1
1
1
1
1
1
1
31
1
33
33
33
33
1
1
1
1
1
1
33
33
1
1
1
1
1
1
21
1
23
1
1
1
1
1
1
1
1
1
1
1
1
1
1
23
23
4
21
1
1
1
32
1
1
1
1
32
32
32
32
1
1
1
1
33
33
1
1
1
1
1
21
21
21
1
1
1
1
1
1
21
1
1
1
1
21
1
21
33
1
1
1
1
1
1
21
1
33
1
1
1
1
1
21
1
1
1
1
1
