# Supplementary material for: Categorical Cross‐Recurrence Quantification Analysis Applied to Communicative Interaction during Ainsworth’s Strange Situation
Source: Hindawi journal article supplement (doi:10.1155/2018/4547029), 2018-01-01
Supplement: f1 [file 4547029.f1.zip › 4547029.f1/Video 2/Grammar Structure V2/Original_Grammar_St_V2.txt]

1
1
1
1
1
1
1
1
1
1
1
1
1
1
1
1
1
1
1
1
1
1
1
1
1
1
1
1
1
1
1
1
1
1
1
1
1
1
13
16
12
8
1
6
7
5
16
6
8
6
7
14
15
6
8
12
8
5
7
1
6
6
8
12
7
5
5
7
13
12
5
5
7
12
12
6
8
12
8
12
8
10
13
15
8
12
8
12
7
10
11
12
8
12
8
5
7
12
12
6
8
12
8
12
6
16
1
1
1
1
10
6
6
8
10
13
15
6
8
8
8
12
8
10
7
11
10
6
8
12
8
12
10
12
10
15
15
10
1
8
12
8
6
7
10
11
8
12
8
12
15
10
1
5
7
12
15
12
8
12
13
12
10
1
1
12
12
6
8
12
8
12
8
13
8
9
7
1
10
10
12
13
15
10
16
6
8
8
5
7
12
8
10
8
9
7
6
6
8
12
8
12
8
5
7
13
16
1
16
1
1
1
8
16
8
8
8
6
8
8
12
8
5
7
8
8
8
12
10
12
10
6
8
12
6
8
1
8
10
10
12
6
9
12
8
5
12
8
10
12
8
8
8
1
1
1
1
16
12
8
8
8
8
12
12
8
8
10
1
1
1
1
1
1
1
1
1
1
1
1
1
1
1
1
1
1
1
1
1
1
1
1
1
1
1
1
1
1
1
1
1
1
1
1
1
1
1
1
1
1
1
1
1
1
1
1
1
1
1
1
1
1
16
9
10
8
8
8
12
12
1
8
12
12
7
10
13
1
1
1
1
1
1
1
1
1
1
1
1
1
1
1
1
1
1
1
1
1
1
1
1
1
1
1
1
1
1
1
1
1
1
1
1
1
1
1
1
1
1
1
1
1
1
1
1
1
1
1
1
1
1
1
1
1
1
1
1
1
1
1
