# Supplementary material for: Categorical Cross‐Recurrence Quantification Analysis Applied to Communicative Interaction during Ainsworth’s Strange Situation
Source: Hindawi journal article supplement (doi:10.1155/2018/4547029), 2018-01-01
Supplement: f1 [file 4547029.f1.zip › 4547029.f1/Video 2/Grammar Structure V2/Randomized_Grammar_Ca_V2.txt]

1
1
1
1
1
1
1
8
5
8
1
1
6
1
1
1
1
7
12
1
1
1
10
1
10
1
1
1
1
10
8
1
1
1
1
1
1
1
12
1
1
1
8
1
8
1
12
1
1
1
1
1
12
1
1
8
1
1
1
1
1
1
8
1
1
1
1
10
6
10
1
1
1
6
1
1
6
6
1
1
1
1
1
1
1
1
1
1
10
1
1
1
1
1
1
1
1
8
8
8
1
1
1
12
1
1
1
1
1
1
1
1
1
1
1
5
1
12
1
1
8
1
1
1
1
9
1
8
1
1
8
6
1
1
1
1
1
1
1
1
7
10
1
8
1
1
1
1
1
1
1
1
10
1
12
1
1
1
1
5
1
1
1
1
1
7
1
1
10
1
1
1
1
1
8
6
1
10
1
1
1
1
1
1
1
8
1
1
1
6
1
8
1
6
1
5
1
1
1
1
1
7
1
1
1
1
10
1
1
8
10
1
7
8
16
5
8
8
8
1
1
1
10
1
6
7
1
10
1
1
1
12
1
1
1
1
1
12
1
1
1
6
1
1
1
1
1
8
1
1
1
1
1
1
10
1
1
1
1
1
10
8
1
1
1
1
1
1
1
6
1
13
6
8
1
1
8
1
1
1
1
1
9
10
1
1
1
1
1
10
6
1
1
1
1
1
1
1
6
8
1
1
1
1
10
10
1
1
1
1
1
1
1
1
1
10
1
1
1
9
1
8
1
1
10
1
1
1
1
1
1
1
1
1
8
1
1
1
1
1
1
6
1
1
1
12
1
8
8
1
1
1
1
1
1
1
1
1
10
8
1
1
1
1
8
1
1
1
1
1
1
1
1
1
1
1
1
1
1
12
12
1
13
8
10
1
16
1
1
8
13
1
7
1
1
1
8
8
8
12
