# Supplementary material for: Categorical Cross‐Recurrence Quantification Analysis Applied to Communicative Interaction during Ainsworth’s Strange Situation
Source: Hindawi journal article supplement (doi:10.1155/2018/4547029), 2018-01-01
Supplement: f1 [file 4547029.f1.zip › 4547029.f1/Video 2/Grammar Structure V2/Randomized_Grammar_St_V2.txt]

1
12
6
8
1
12
5
1
1
1
1
8
1
8
7
1
1
9
1
8
1
12
1
15
10
1
8
10
1
1
7
6
1
6
13
7
8
1
7
12
1
10
1
1
12
13
12
6
12
8
12
12
12
1
15
8
6
8
1
1
5
8
8
8
1
1
8
5
1
6
1
9
1
1
1
16
1
12
1
6
8
12
13
1
16
1
12
8
8
1
7
1
1
8
12
1
1
12
8
1
1
12
10
10
1
1
1
7
8
7
6
1
10
15
8
8
8
8
16
15
8
12
12
1
1
10
1
1
8
8
1
1
10
1
10
1
8
1
10
8
12
1
1
1
12
12
10
1
1
1
8
12
1
16
12
12
8
10
1
1
5
1
1
12
1
7
12
1
6
1
8
1
12
16
1
1
1
1
1
6
1
6
1
1
12
1
12
1
13
1
1
12
1
1
10
10
1
8
6
1
1
8
1
1
7
5
8
10
9
5
1
1
6
5
1
1
10
10
8
12
12
1
7
13
5
1
1
8
11
1
15
1
12
11
8
1
1
8
7
12
7
1
1
13
1
16
15
1
1
1
12
1
8
1
7
8
1
1
16
1
13
1
8
1
1
1
15
1
8
10
8
1
5
1
12
1
1
1
1
9
1
6
1
12
8
7
1
8
1
5
1
12
1
1
10
12
8
1
13
15
1
8
1
1
1
12
1
10
1
1
10
12
12
1
6
1
8
1
1
12
5
1
1
1
16
6
8
12
1
12
6
1
8
1
6
1
1
1
8
11
1
8
1
8
8
1
6
1
1
8
1
8
8
1
14
13
8
8
12
12
12
8
1
1
1
10
5
1
1
1
1
6
6
16
1
8
1
8
1
10
12
7
1
12
1
1
6
1
8
7
1
8
7
1
1
1
10
8
1
1
