# Supplementary material for: Categorical Cross‐Recurrence Quantification Analysis Applied to Communicative Interaction during Ainsworth’s Strange Situation
Source: Hindawi journal article supplement (doi:10.1155/2018/4547029), 2018-01-01
Supplement: f1 [file 4547029.f1.zip › 4547029.f1/Video 2/Strange Situation Transcription V2.xlsx]

## Sheet: Situación Extraña
Palabras sujeto 1	Palabras sujeto 2	Palabras sujeto 3		Movimientos sujeto 1	Movimientos sujeto 2	Movimientos sujeto 3		Miradas sujeto 1	Miradas sujeto 2	Miradas sujeto 3
Viste	.	.		Tjgt3	Tjgt3	.		Mhdl	Mjgt3	.
Este va ahí	.	.		.	.	.		.	.	.
.	.	.		Slv	.	.		.	.	.
.	.	.		.	Jgjgt3	.		Mrsill	Mhdl	.
.	.	.		.	.	.		Mppl	.	.
.	BalbuceaAa	.		Snr	Aphdl	.		.	.	.
.	BalbuceaEe	.		.	Tjgt3	.		.	.	.
.	.	.		.	Jgjgt3	.		.	.	.
.	.	.		.	.	.		Mnñ	Mjgt1	.
.	.	.		.	Tjgt1	.		Mppl	.	.
.	.	.		.	Jgjgt1	.		.	.	.
.	BalbuceaEe	.		.	.	.		.	.	.
¿Qué pasa? Que	BalbuceaAa	.		.	.	.		.	Mjgt2	.
Ya yo te lo paso	.	.		Tjgt2	.	.		Mjgt2	.	.
.	.	.		Tjgt3	.	.		Mjgt3	.	.
.	BalbuceaIi	.		.	.	.		.	MaMm	.
La vaca, toma la vaca	.	.		.	.	.		.	.	.
La vaca, mira juega acá	.	.		Slv	.	.		Mnñ	Mjgt2	.
.	.	.		Tjgt2	Jgjgt2	.		.	.	.
.	BalbuceaAa	.		.	Jgjgt3	.		.	.	.
.	BalbuceaIi	.		.	Tjgt3	.		.	Mjgt3	.
.	.	.		.	Sltjgt3	.		.	.	.
.	.	.		.	.	Etrsal		MrExñ	Mjgt3	.
.	.	.		.	.	Cm		.	MrExñ	.
.	.	.		.	.	Tppl		.	.	.
.	.	.		.	.	Ssnt		Mhdl	.	.
.	BalbuceaIi	.		.	.	.		.	MaMm	Mppl
¿Qué te pasó?	.	.		.	.	.		.	MrExñ	.
.	.	.		.	.	.		.	Mhdl	.
.	.	.		.	Tjgt3	.		.	.	.
.	.	.		.	Mdjgt3	.		.	.	.
.	.	Hola Agustina, ¿cómo estás?		.	.	.		MrExñ	.	MaMm
Hola	.	.		.	.	.		.	.	.
.	.	Mi nombre es Carla, yo soy la extraña, eee. Bueno tu escuchaste que golpearon la puerta.		.	.	.		.	MrExñ	.
Si	.	.		.	.	.		.	.	.
.	.	Nosotros nos comunicamos con golpes en la puerta		Ascb	.	Mvbr		.	.	.
.	.	Eee, esa es la señal de que yo tenía que comenzar a hablarle, ya.		.	.	.		.	.	Mnñ
.	.	Eee, luego vamos a escuchar otros golpes más y esa va a ser la señal de que yo baje a jugar con la Marti		.	.	.		.	.	.
Yo me quedo aquí	.	.		.	.	.		.	.	.
.	.	Si tu te quedas ahí		.	.	.		.	.	.
.	.	Eee, mientras yo estoy jugando van a sonar dos golpecitos		.	.	Mvm		.	.	.
.	.	Y ahí tu tienes que retirarte de acá lo más sigilosamente posible, ya.		.	Tjgt2	.		.	Mjgt2	.
Ya	.	.		.	.	.		.	Mjgt3	.
.	.	Tienes que dejar tu maleta ahí y tienes que dirigirte hacia afuera, ya.		.	Tjgt3	.		.	.	.
Ya	.	.		.	.	.		.	.	.
.	.	La puerta por si acaso se abre hacia, perdón, hacia acá		.	.	.		.	.	.
Aaa, ya	.	.		.	.	.		.	.	.
.	.	Para que te acuerdes cuando vuelvas a entrar		.	Jgjgt3	.		.	.	.
.	.	Emm, ¿tienes alguna duda?		.	.	.		.	.	.
No	.	.		.	.	.		.	.	.
.	.	¿No? Ya, eee, nuevamente afuera, Camila tu puedes hacer las preguntas que quieras. Si tienes alguna duda ellos de van a volver a explicar el procedimiento		.	.	Sagch		Mnñ	.	Mnñ
.	.	Hola Marti		.	.	.		.	.	.
.	BalbuceaIi	.		.	.	.		.	MaMm	.
Que amor, mmm	.	Marti		.	.	Tjgt1		.	.	.
.	BalbuceaIi	.		.	.	.		.	Mrhld	.
.	.	Mira		.	.	Lvjgt1		.	.	.
.	.	Marti, mira ¿quieres jugar conmigo?		.	.	.		.	Mjgt1	.
.	.	¿Quieres jugar a hacer la torre?, mira		.	.	.		.	.	.
.	.	Podemos poner esto aquí		.	.	Jgjgt1		.	.	.
.	.	Esta ahí		.	.	.		.	.	.
.	.	Te toca a ti, toma		.	.	Lvjgt1		Mnñ	Mjgt1	.
.	.	.		.	Tjgt1	.		.	MrExñ	.
.	.	Ponlo ahí, ahí		.	Jgjgt1	.		.	.	.
.	.	Eso		.	.	.		Mhdl	.	.
.	.	Que linda		Slv	.	.		.	.	.
.	.	Este, pon el otro		Cm	.	.		.	MaMm	.
.	.	Ponlo ahí, eso		SLsal	Jgjgt1	.		.	.	.
.	.	Toma, sigue jugando		.	.	Slv		.	MrExñ	.
.	.	.		.	.	Cm		.	Mjgt1	.
.	.	.		.	.	Tppl		.	MrExñ	.
.	.	.		.	.	Ssnt		.	Mjgt2y1	.
.	.	.		.	Tjgt3	.		.	.	Mppl
.	.	.		.	Pchr	.		.	.	.
.	.	.		.	.	.		.	Mrhld	.
.	Llora	.		.	.	.		.	.	.
.	Llorafuerte	.		.	.	.		.	.	Mnñ
.	.	.		.	.	Dppl		.	.	.
.	.	.		.	.	Slv		.	.	.
.	.	.		.	.	Sagch		.	.	Mjgt3
.	.	Martina, que pasó, mira		.	.	Tjgt3		.	Mjgt3	.
.	.	Toma juega con esta		.	Tjgt3	.		.	.	.
.	.	Quieres ponerlo ahí		.	Jgjgt3	Apjgt3		.	.	.
.	.	.		.	.	Slv		.	.	.
.	.	.		.	.	Cm		.	.	.
.	.	.		.	.	Ssnt		.	.	.
.	.	.		.	Pchr	.		.	Mrhld	Mppl
.	Llora	.		.	.	.		.	.	Mnñ
.	.	.		.	.	.		.	Mjgt3	.
.	.	.		.	Jgjgt3	.		.	.	.
.	Llora	.		.	.	.		.	.	Mnñ
.	.	.		.	Mvdohdl	.		.	.	.
.	Llorafuerte	.		.	.	.		.	.	Mnñ
.	.	.		.	.	Slv		.	.	.
.	.	.		.	.	Sagch		.	.	.
.	.	.		.	.	Tmnñ		.	.	.
.	.	.		.	.	Tmnñ		.	.	.
.	.	.		.	.	.		.	Msl	.
.	.	.		.	.	Tjgt1		.	.	.
.	.	.		.	.	Jgjgt1		.	.	.
.	.	.		.	.	Slv		.	.	.
.	.	.		.	.	Cm		.	MrExñ	.
.	.	.		.	.	Ssnt		.	.	.
.	.	.		.	.	Tppl		.	.	.
.	.	.		.	.	.		.	Mhdl	.
.	Llora	.		.	.	.		.	MaMm	.
Aquí vine	GritaEee	.		Etrsal	Mvbr	.		.	.	.
Por Dios que feliz te pusiste	.	.		Sagch	.	.		.	Mjgt3	.
Juguemos	Llora	.		Tjgt3	.	Slv		.	.	.
.	.	.		Jgjgt3	.	Cm		.	.	.
.	.	.		.	Tjgt3	SLsal		.	Mjgt1	.
.	.	.		Tjgt2	.	.		.	.	.
.	.	.		Tjgt3	.	.		.	.	.
.	.	.		Jgjgt3	.	.		.		.
.	.	.		Tjgt1	.	.		.	.	.
.	.	.		.	Jgjgt3	.		Mnñ	.	.
.	Llora	.		.	.	.		.	.	.
.	.	.		.	Sltjgt3	.		.	.	.
.	Llorafuerte	.		.	.	.		Mnñ	.	.
.	.	.		Abnñ	.	.		.	.	.
.	.	.		Tjgt2	.	.		.	.	.
.	.	.		Jgjgt2	.	.		.	.	.
.	.	.		.	.	.		.	Mjgt2	.
.	.	.		.	Tjgt2	.		.	.	.
.	Llora	.		.	.	.		Mnñ	.	.
.	.	.		Tjgt2	.	.		.	.	.
.	.	.		Bsnñ	.	.		.	.	.
.	.	.		.	AbMm	.		.	.	.
.	.	.		Abnñ	.	.		.	.	.
.	.	.		.	.	.		.	Mhatr	.
Quien estaba ahí	.	.		.	.	.		.	.	.
No está	.	.		.	.	.		Mhatr	.	.
.	.	.		Tjgt1y3	.	.		.	.	.
.	.	.		Abnñ	.	.		.	.	.
.	.	.		.	AbMm	.		Mhdl	Mhdl	.
.	.	.		.	Snr	.		.	.	.
.	BalbuceaAa	.		Tmnñ	.	.		.	.	.
.	.	.		.	Slv	.		.	Mhdl	.
.	.	.		.	Cm	.		Mhdl	.	.
.	.	.		.	Tjgt3	.		.	.	.
.	BalbuceaIi	.		Tjgt2	.	.		.	.	.
Te gusta este	BalbuceaIi	.		.	.	.		.	.	.
Juguemos aquí	.	.		.	.	.		Msl	.	.
Ahí estas mejor ya	.	.		Tmnñ	.	.		.	MaMm	.
Ya, juguemos	BalbuceaIi	.		.	.	.		.	.	.
.	.	.		Tjgt3	.	.		.	Mjgt3	.
.	.	.		Jgjgt3	.	.		.	.	.
.	.	.		.	Tjgt3	.		.	.	.
.	.	.		.	.	.		.	MaMm	.
Juega, mira	.	.		.	.	.		.	.	.
Ponlo ahí	.	.		.	.	.		.	Mhdl	.
.	.	.		.	Jgjgt3	.		.	.	.
.	.	.		Slv	.	.		Mnñ	MaMm	.
.	Llora	.		Cm	.	.		.	.	.
.	.	.		SLsal	.	.		.	.	.
.	Llorafuerte	.		.	.	Etrsal		.	.	.
.	.	.		.	.	.		.	MrExñ	Mnñ
.	.	Martina, pequeña no llore		.	.	Tmnñ		.	.	.
.	.	Estabas jugando con eso		.	.	.		.	.	Mjgt3
.	.	.		.	.	.		.	Mhdl	.
.	.	Estabas con ese juguetito		.	.	.		.	.	.
.	Llorafuerte	Ya, shhh		.	.	Abnñ		.	.	.
.	Gritayllora	.		Etrsal	Mvbr	.		.	MaMm	.
Martina, ya	.	.		Tmnñ	.	Slv		.	.	.
.	.	.		Abnñ	.	Ssnt		.	.	.
.	.	.		Bsnñ	.	Slv		.	.	.
.	BalbuceaEe	.		.	.	SLsal		.	MrExñ	.
Levanta la manito	.	.		Mvbr	Mvdo	.		.	.	.
¿Pasó?	.	.		Abnñ	.	.		.	MaMm	.
Mira, ¿qué hay acá?	BalbuceaEe	.		.	.	.		.	.	.
.	.	.		Bsnñ	.	.		.	.	.
.	.	.		Tjgt3	.	.		.	Mjgt3	.
Mira, viste	.	.		Jgjgt3	.	.		.	.	.
¿Quieres jugar?	BalbuceaIi	.		.	Mvcb	.		.	.	.
Juguemos con este	.	.		Tjgt1	.	.		.	.	.
Ahí, viste	.	.		Jgjgt1	.	.		.	Mjgt1	.
Ya, no llore	Llora	.		.	.	.		.	.	.
Mira este	.	.		.	Tjgt1	.		.	.	.
Hay que ponerlos aquí	.	.		.	Mvcb	.		.	.	.
.	Llora	.		Abnñ	.	.		.	MaMm	.
.	.	.		Bsnñ	.	.		Mnñ	Mjgt3	.
.	.	.		Tmnñ	.	.		Mjgt3	.	.
.	.	.		Tjgt3	.	.		.	.	.
Tratemos de ponerlo	.	.		Jgjgt3	.	.		.	Mjgts	.
.	Llora	.		.	.	.		Mjgt2	.	.
.	.	.		Tjgt2	.	.		.	.	.
.	.	.		Jgjgt2	.	.		.	.	.
.	Llora	.		.	.	.		.	.	.
.	BalbuceaIi	.		.	.	.		.	.	.
.	.	.		Tjgt1y3	.	.		.	.	.
.	.	.		.	Cm	.		.	.	.
Ahí está el avión	.	.		.	Tjgt2	.		.	Mjgt2	.
.	.	.		.	Jgjgt2	.		.	.	.
.	.	.		Jgjgt2	.	.		.	.	.
.	Llora	.		Tmnñ	.	.		.	.	.
.	.	.		.	.	.		.	Mhdl	.
.	.	.		Tjgt3	Cm	.		.	.	.
.	.	.		Jgjgt3	.	.		.	.	.
.	BalbuceaIi	.		.	.	.		.	.	.
La quieres. ¿No? Tampoco	.	.		Tjgt1	.	.		.	Mjgt1	.
.	.	.		Jgjgt1	.	.		.	.	.
.	Llora	.		Tmnñ	.	.		.	.	.
.	.	.		.	.	.		.	Mjgt2	.
¿El avión, el avión?	.	.		.	.	.		.	.	.
Estructura gramatical				Movimiento corporal				Movimiento ocular
1	Silencio			1	Tjgt1	Toma juguete 1		1	Mjgt1	Mira juguete 1
2	Lenguaje inarticulado (Llanto)			2	Tjgt2	Toma juguete 2		2	Mjgt2	Mira juguete 2
3	Lenguaje inarticulado (Balbuceo)			3	Tjgt3	Toma juguete 3		3	Mjgt3	Mira juguete 3
4	Artículo			4	Jgjgt1	Juega con juguete 1		4	Mjgts	Mira los juguetes
5	Pronombre			5	Jgjgt2	Juega con juguete 2		5	Mhdl	Mira hacia delante
6	Sustantivo			6	Jgjgt3	Juega con juguete 3		6	Mnñ	Mira a la niña
7	Verbo			7	Tjgt1y3	Toma juguete 1 y 3		7	MaMm	Mira a la madre
8	Adjetivo			8	Sltjgt3	Suelta juguete 3		8	MrExñ	Mira al extraño
9	Adverbio			9	Mdjgt3	Muerde juguete 3		9	Msl	Mira el suelo
10	Conjunción			10	Lvjgt1	Levanta juguete 1		10	Mhatr	Mira hacia atrás
11	Preposición			11	Cm	Camina		11	Mrhld	Mira hacia el lado
12	Interjección			12	Slv	Se levanta		12	Mppl	Mira el papel
13	Contracción			13	Ssnt	Se sienta		13	Mjgt2y1	Mira juguete 2 y 1
14	Locución adverbial			14	Sagch	Se agacha		14	Mrsill	Mira la silla
				15	Dppl	Deja el papel
				16	Tppl	Toma el papel
				17	Tmnñ	Toma la niña
				18	Abnñ	Abraza a la niña
				19	AbMm	Abraza a la madre
				20	SLsal	Sale de la sala
				21	Etrsal	Entra a la sala
				22	Mvdo	Mueve el dorso
				23	Mvbr	Mueve los brazos
				24	Mvcb	Mueva la cabeza
				25	Bsnñ	Besa a la niña
				26	Mvdohdl	Mueve el dorso hacia delante
				27	Apjgt3	Apunta juguete 3
				28	Aphdl	Apunta hacia delante
				29	Pchr	Puchero
				30	Mvm	Mueve manos
				31	Snr	Sonríe
				32	Ascb	Asiente con la cabeza
				Movimiento corporal				Movimiento ocular

## Sheet: Palabras Madre
Palabras sujeto 1
Viste	8
Este va ahí	6	8	10
.	1
.	1
.	1
.	1
.	1
.	1
.	1
.	1
.	1
.	1
¿Qué pasa? Que	6	8	6
Ya yo te lo paso	12	6	6	5	8
.	1
.	1
La vaca, toma la vaca	6	7	8	6	7
La vaca, mira juega acá	6	7	8	8	10
.	1
.	1
.	1
.	1
.	1
.	1
.	1
.	1
.	1
¿Qué te pasó?	12	6	8
.	1
.	1
.	1
.	1	1	1	1
Hola	13
.	1	1	1	1	1	1	1	1	1	1	1	1	1	1	1	1
Si	10
.	1	1	1	1	1	1	1	1
.	1	1	1	1	1	1	1	1	1	1	1	1	1	1
.	1	1	1	1	1	1	1	1	1	1	1	1	1	1	1	1	1	1	1	1	1	1	1	1
Yo me quedo aquí	6	6	8	10
.	1	1	1	1	1
.	1	1	1	1	1	1	1	1	1	1
.	1	1	1	1	1	1	1	1	1	1	1	1	1
Ya	10
.	1	1	1	1	1	1	1	1	1	1	1	1	1
Ya	10
.	1	1	1	1	1	1	1	1	1	1
Aaa, ya	13	10
.	1	1	1	1	1	1	1	1
.	1	1	1	1
No	10
.	1	1	1	1	1	1	1	1	1	1	1	1	1	1	1	1	1	1	1	1	1	1	1	1	1	1	1
.	1	1
.	1
Que amor, mmm	12	9	13
.	1
.	1
.	1	1	1	1	1
.	1	1	1	1	1	1	1
.	1	1	1	1
.	1	1
.	1	1	1	1	1
.	1
.	1	1	1
.	1
.	1	1
.	1	1	1	1
.	1	1	1
.	1	1	1
.	1
.	1
.	1
.	1
.	1
.	1
.	1
.	1
.	1
.	1
.	1
.	1	1	1	1
.	1	1	1	1
.	1	1	1
.	1
.	1
.	1
.	1
.	1
.	1
.	1
.	1
.	1
.	1
.	1
.	1
.	1
.	1
.	1
.	1
.	1
.	1
.	1
.	1
.	1
.	1
.	1
Aquí vine	10	8
Por Dios que feliz te pusiste	12	16	12	9	6	8
Juguemos	8
.	1
.	1
.	1
.	1
.	1
.	1
.	1
.	1
.	1
.	1
.	1
.	1
.	1
.	1
.	1
.	1
.	1
.	1
.	1
.	1
.	1
Quien estaba ahí	6	8	10
No está	10	8
.	1
.	1
.	1
.	1
.	1
.	1
.	1
.	1
.	1
Te gusta este	6	8	12
Juguemos aquí	8	10
Ahí estas mejor ya	10	6	9	10
Ya, juguemos	10	8
.	1
.	1
.	1
.	1
Juega, mira	8	8
Ponlo ahí	8	10
.	1
.	1
.	1
.	1
.	1
.	1
.	1	1	1	1
.	1	1	1	1
.	1
.	1	1	1	1
.	1	1
.	1	1
Martina, ya	16	10
.	1
.	1
.	1
Levanta la manito	8	5	7
¿Pasó?	8
Mira, ¿qué hay acá?	8	12	8	10
.	1
.	1
Mira, viste	8	8
¿Quieres jugar?	8	8
Juguemos con este	8	12	12
Ahí, viste	10	8
Ya, no llore	10	12	8
Mira este	8	12
Hay que ponerlos aquí	8	12	8	10
.	1
.	1
.	1
.	1
Tratemos de ponerlo	8	12	8
.	1
.	1
.	1
.	1
.	1
.	1
.	1
Ahí está el avión	10	8	5	7
.	1
.	1
.	1
.	1
.	1
.	1
.	1
La quieres. ¿No? Tampoco	6	8	10	10
.	1
.	1
.	1
¿El avión, el avión?	5	7	5	7

## Sheet: Palabras Niño
Palabras sujeto 2
.	1
.	1	1	1
.	1
.	1
.	1
Balbucea "Aaa"	31
Balbucea "Eee"	32
.	1
.	1
.	1
.	1
Balbucea "Eee"	32
Balbucea "Aaa"	31	31	31
.	1	1	1	1	1
.	1
Balbucea "Iii"	33
.	1	1	1	1	1
.	1	1	1	1	1
.	1
Balbucea "Aaa"	31
Balbucea "Iii"	33
.	1
.	1
.	1
.	1
.	1
Balbucea "Iii"	33
.	1	1	1
.	1
.	1
.	1
.	1	1	1	1
.	1
.	1	1	1	1	1	1	1	1	1	1	1	1	1	1	1	1
.	1
.	1	1	1	1	1	1	1	1
.	1	1	1	1	1	1	1	1	1	1	1	1	1	1
.	1	1	1	1	1	1	1	1	1	1	1	1	1	1	1	1	1	1	1	1	1	1	1	1
.	1	1	1	1
.	1	1	1	1	1
.	1	1	1	1	1	1	1	1	1	1
.	1	1	1	1	1	1	1	1	1	1	1	1	1
.	1
.	1	1	1	1	1	1	1	1	1	1	1	1	1
.	1
.	1	1	1	1	1	1	1	1	1	1
.	1	1
.	1	1	1	1	1	1	1	1
.	1	1	1	1
.	1
.	1	1	1	1	1	1	1	1	1	1	1	1	1	1	1	1	1	1	1	1	1	1	1	1	1	1	1
.	1	1
Balbucea "Iii"	33
.	1	1	1
Balbucea "Iii"	33
.	1
.	1	1	1	1	1
.	1	1	1	1	1	1	1
.	1	1	1	1
.	1	1
.	1	1	1	1	1
.	1
.	1	1	1
.	1
.	1	1
.	1	1	1	1
.	1	1	1
.	1	1	1
.	1
.	1
.	1
.	1
.	1
.	1
Llora	21
Llora fuerte	23
.	1
.	1
.	1
.	1	1	1	1
.	1	1	1	1
.	1	1	1
.	1
.	1
.	1
.	1
Llora	21
.	1
.	1
Llora	21
.	1
Llora fuerte	23
.	1
.	1
.	1
.	1
.	1
.	1
.	1
.	1
.	1
.	1
.	1
.	1
Llora	21
Grita "Eee"	42	42
.	1	1	1	1	1	1
Llora	21
.	1
.	1
.	1
.	1
.	1
.	1
.	1
Llora	21
.	1
Llora fuerte	23
.	1
.	1
.	1
.	1
.	1
Llora	21
.	1
.	1
.	1
.	1
.	1
.	1	1	1
.	1	1
.	1
.	1
.	1
.	1
Balbucea "Aaa"	31
.	1
.	1
.	1
Balbucea "Iii"	33
Balbucea "Iii"	33	33	33
.	1	1
.	1	1	1	1
Balbucea "Iii"	33	33
.	1
.	1
.	1
.	1
.	1	1
.	1	1
.	1
.	1
Llora	21
.	1
Llora fuerte	23
.	1
.	1	1	1	1
.	1	1	1	1
.	1
.	1	1	1	1
Llora fuerte	23	23
Grita y llora	4	21
.	1	1
.	1
.	1
Balbucea "Eee"	32
.	1	1	1
.	1
Balbucea "Eee"	32	32	32	32
.	1
.	1
.	1	1
Balbucea "Iii"	33	33
.	1	1	1
.	1	1
Llora	21	21	21
.	1	1
.	1	1	1	1
Llora	21
.	1
.	1
.	1
.	1	1	1
Llora	21
.	1
.	1
Llora	21
Balbucea "Iii"	33
.	1
.	1
.	1	1	1	1
.	1
.	1
Llora	21
.	1
.	1
.	1
Balbucea "Iii"	33
.	1	1	1	1
.	1
Llora	21
.	1
.	1	1	1	1

## Sheet: Palabras Extraño
Palabras sujeto 3
.	1
.	1	1	1
.	1
.	1
.	1
.	1
.	1
.	1
.	1
.	1
.	1
.	1
.	1	1	1
.	1	1	1	1	1
.	1
.	1
.	1	1	1	1	1
.	1	1	1	1	1
.	1
.	1
.	1
.	1
.	1
.	1
.	1
.	1
.	1
.	1	1	1
.	1
.	1
.	1
Hola Agustina, ¿cómo estás?	13	16	12	8
.	1
Mi nombre es Carla, yo soy la extraña, eee. Bueno tu escuchaste que golpearon la puerta.	6	7	5	16	6	8	6	7	14	15	6	8	12	8	5	7
.	1
Nosotros nos comunicamos con golpes en la puerta	6	6	8	12	7	5	5	7
Eee, esa es la señal de que yo tenía que comenzar a hablarle, ya.	13	12	5	5	7	12	12	6	8	12	8	12	8	10
Eee, luego vamos a escuchar otros golpes más y esa va a ser la señal de que yo baje a jugar con la Marti	13	15	8	12	8	12	7	10	11	12	8	12	8	5	7	12	12	6	8	12	8	12	6	16
.	1	1	1	1
Si tu te quedas ahí	10	6	6	8	10
Eee, mientras yo estoy jugando van a sonar dos golpecitos	13	15	6	8	8	8	12	8	10	7
Y ahí tu tienes que retirarte de acá lo más sigilosamente posible, ya.	11	10	6	8	12	8	12	10	12	10	15	15	10
.	1
Tienes que dejar tu maleta ahí y tienes que dirigirte hacia afuera, ya.	8	12	8	6	7	10	11	8	12	8	12	15	10
.	1
La puerta por si acaso se abre hacia, perdón, hacia acá	5	7	12	15	12	8	12	13	12	10
.	1	1
Para que te acuerdes cuando vuelvas a entrar	12	12	6	8	12	8	12	8
Emm, ¿tienes alguna duda?	13	8	9	7
.	1
¿No? Ya, eee, nuevamente afuera, Camila tu puedes hacer las preguntas que quieras. Si tienes alguna duda ellos de van a volver a explicar el procedimiento	10	10	12	13	15	10	16	6	8	8	5	7	12	8	10	8	9	7	6	6	8	12	8	12	8	5	7
Hola Marti	13	16
.	1
Marti	16	1	1
.	1
Mira	8
Marti, mira ¿quieres jugar conmigo?	16	8	8	8	6
¿Quieres jugar a hacer la torre?, mira	8	8	12	8	5	7	8
Podemos poner esto aquí	8	8	12	10
Esta ahí	12	10
Te toca a ti, toma	6	8	12	6	8
.	1
Ponlo ahí, ahí	8	10	10
Eso	12
Que linda	6	9
Este, pon el otro	12	8	5	12
Ponlo ahí, eso	8	10	12
Toma, sigue jugando	8	8	8
.	1
.	1
.	1
.	1
.	1
.	1
.	1
.	1
.	1
.	1
.	1
Martina, que pasó, mira	16	12	8	8
Toma juega con esta	8	8	12	12
Quieres ponerlo ahí	8	8	10
.	1
.	1
.	1
.	1
.	1
.	1
.	1
.	1
.	1
.	1
.	1
.	1
.	1
.	1
.	1
.	1
.	1
.	1
.	1
.	1
.	1
.	1
.	1
.	1	1
.	1	1	1	1	1	1
.	1
.	1
.	1
.	1
.	1
.	1
.	1
.	1
.	1
.	1
.	1
.	1
.	1
.	1
.	1
.	1
.	1
.	1
.	1
.	1
.	1
.	1
.	1	1	1
.	1	1
.	1
.	1
.	1
.	1
.	1
.	1
.	1
.	1
.	1
.	1	1	1
.	1	1
.	1	1	1	1
.	1	1
.	1
.	1
.	1
.	1
.	1	1
.	1	1
.	1
.	1
.	1
.	1
.	1
.	1
Martina, pequeña no llore	16	9	10	8
Estabas jugando con eso	8	8	12	12
.	1
Estabas con ese juguetito	8	12	12	7
Ya, shhh	10	13
.	1	1
.	1	1
.	1
.	1
.	1
.	1	1	1
.	1
.	1	1	1	1
.	1
.	1
.	1	1
.	1	1
.	1	1	1
.	1	1
.	1	1	1
.	1	1
.	1	1	1	1
.	1
.	1
.	1
.	1
.	1	1	1
.	1
.	1
.	1
.	1
.	1
.	1
.	1
.	1	1	1	1
.	1
.	1
.	1
.	1
.	1
.	1
.	1
.	1	1	1	1
.	1
.	1
.	1
.	1	1	1	1

## Sheet: Mov Corporal Madre
Movimientos sujeto 1
Tjgt3	4
.	1
Slv	13
.	1
.	1
Sonrie	32
.	1
.	1
.	1
.	1
.	1
.	1
.	1
Tjgt2	3
Tjgt3	4
.	1
.	1
Slv	13
Tjgt2	3
.	1
.	1
.	1
.	1
.	1
.	1
.	1
.	1
.	1
.	1
.	1
.	1
.	1
.	1
.	1
.	1
Asiente con la cabeza	33
.	1
.	1
.	1
.	1
.	1
.	1
.	1
.	1
.	1
.	1
.	1
.	1
.	1
.	1
.	1
.	1
.	1
.	1
.	1
.	1
.	1
.	1
.	1
.	1
.	1
.	1
.	1
.	1
Slv	13
Cm	12
SLsal	21
.	1
.	1
.	1
.	1
.	1
.	1
.	1
.	1
.	1
.	1
.	1
.	1
.	1
.	1
.	1
.	1
.	1
.	1
.	1
.	1
.	1
.	1
.	1
.	1
.	1
.	1
.	1
.	1
.	1
.	1
.	1
.	1
.	1
.	1
.	1
.	1
.	1
.	1
Etrsal	22
Sagch	15
Tjgt3	4
Jgjgt3	7
.	1
Tjgt2	3
Tjgt3	4
Jgjgt3	7
Tjgt1	2
.	1
.	1
.	1
.	1
Abnñ	19
Tjgt2	3
Jgjgt2	6
.	1
.	1
.	1
Tjgt2	3
Bsnñ	26
.	1
Abnñ	19
.	1
.	1
.	1
Tjgt1y3	8
Abnñ	19
.	1
.	1
Tmnñ	18
.	1
.	1
.	1
Tjgt2	3
.	1
.	1
Tmnñ	18
.	1
Tjgt3	4
Jgjgt3	7
.	1
.	1
.	1
.	1
.	1
Slv	13
Cm	12
SLsal	21
.	1
.	1
.	1
.	1
.	1
.	1
.	1
Etrsal	22
Tmnñ	18
Abnñ	19
Bsnñ	26
.	1
Mvbr	24
Abnñ	19
.	1
Bsnñ	26
Tjgt3	4
Jgjgt3	7
.	1
Tjgt1	2
Jgjgt1	5
.	1
.	1
.	1
Abnñ	19
Bsnñ	26
Tmnñ	18
Tjgt3	4
Jgjgt3	7
.	1
Tjgt2	3
Jgjgt2	5
.	1
.	1
Tjgt1y3	8
.	1
.	1
.	1
Jgjgt2	6
Tmnñ	18
.	1
Tjgt3	4
Jgjgt3	7
.	1
Tjgt1	2
Jgjgt1	5
Tmnñ	18
.	1
.	1

## Sheet: Mov Corporal Niño
Movimientos sujeto 2
Tjgt3	4
.	1
.	1
Jgjgt3	7
.	1
Aphdl	29
Tjgt3	4
Jgjgt3	7
.	1
Tjgt1	2
Jgjgt1	5
.	1
.	1
.	1
.	1
.	1
.	1
.	1
Jgjgt2	6
Jgjgt3	7
Tjgt3	4
Sltjgt3	9
.	1
.	1
.	1
.	1
.	1
.	1
.	1
Tjgt3	4
Mdjgt3	10
.	1
.	1
.	1
.	1
.	1
.	1
.	1
.	1
.	1
.	1
Tjgt2	3
.	1
Tjgt3	4
.	1
.	1
.	1
Jgjgt3	7
.	1
.	1
.	1
.	1
.	1
.	1
.	1
.	1
.	1
.	1
.	1
.	1
.	1
Tjgt1	2
Jgjgt1	5
.	1
.	1
.	1
Jgjgt1	5
.	1
.	1
.	1
.	1
Tjgt3	4
Pchr	30
.	1
.	1
.	1
.	1
.	1
.	1
.	1
Tjgt3	4
Jgjgt3	7
.	1
.	1
.	1
Pchr	30
.	1
.	1
Jgjgt3	7
.	1
Mvdohdl	27
.	1
.	1
.	1
.	1
.	1
.	1
.	1
.	1
.	1
.	1
.	1
.	1
.	1
.	1
Mvbr	24
.	1
.	1
.	1
Tjgt3	4
.	1
.	1
.	1
.	1
Jgjgt3	7
.	1
Sltjgt3	9
.	1
.	1
.	1
.	1
.	1
Tjgt2	3
.	1
.	1
.	1
AbMm	20
.	1
.	1
.	1
.	1
.	1
.	1
AbMm	20
Snr	32
.	1
Slv	13
Cm	12
Tjgt3	4
.	1
.	1
.	1
.	1
.	1
.	1
.	1
Tjgt3	4
.	1
.	1
.	1
Jgjgt3	7
.	1
.	1
.	1
.	1
.	1
.	1
.	1
.	1
.	1
.	1
Mvbr	24
.	1
.	1
.	1
.	1
Mvdo	23
.	1
.	1
.	1
.	1
.	1
Mvcb	25
.	1
.	1
.	1
Tjgt1	2
Mvcb	25
.	1
.	1
.	1
.	1
.	1
.	1
.	1
.	1
.	1
.	1
.	1
Cm	12
Tjgt2	3
Jgjgt2	6
.	1
.	1
.	1
Cm	12
.	1
.	1
.	1
.	1
.	1
.	1
.	1

## Sheet: Mov Corporal Extraño
Movimientos sujeto 3
.	1
.	1
.	1
.	1
.	1
.	1
.	1
.	1
.	1
.	1
.	1
.	1
.	1
.	1
.	1
.	1
.	1
.	1
.	1
.	1
.	1
.	1
Etrsal	22
Cm	12
Tppl	17
Ssnt	14
.	1
.	1
.	1
.	1
.	1
.	1
.	1
.	1
.	1
Mvbr	24
.	1
.	1
.	1
.	1
Mvm	31
.	1
.	1
.	1
.	1
.	1
.	1
.	1
.	1
.	1
Sagch	15
.	1
.	1
Tjgt1	2
.	1
Lvjgt1	11
.	1
.	1
Jgjgt1	5
.	1
Lvjgt1	11
.	1
.	1
.	1
.	1
.	1
.	1
Slv	13
Cm	12
Tppl	17
Ssnt	14
.	1
.	1
.	1
.	1
.	1
Dppl	16
Slv	13
Sagch	15
Tjgt3	4
.	1
Apjgt3	28
Slv	13
Cm	12
Ssnt	14
.	1
.	1
.	1
.	1
.	1
.	1
.	1
Slv	13
Sagch	15
Tmnñ	18
Tmnñ	18
.	1
Tjgt1	2
Jgjgt1	5
Slv	13
Cm	12
Ssnt	14
Tppl	17
.	1
.	1
.	1
.	1
Slv	13
Cm	12
SLsal	21
.	1
.	1
.	1
.	1
.	1
.	1
.	1
.	1
.	1
.	1
.	1
.	1
.	1
.	1
.	1
.	1
.	1
.	1
.	1
.	1
.	1
.	1
.	1
.	1
.	1
.	1
.	1
.	1
.	1
.	1
.	1
.	1
.	1
.	1
.	1
.	1
.	1
.	1
.	1
.	1
.	1
.	1
.	1
.	1
Etrsal	22
.	1
Tmnñ	18
.	1
.	1
.	1
Abnñ	19
.	1
Slv	13
Ssnt	14
Slv	13
SLsal	21
.	1
.	1
.	1
.	1
.	1
.	1
.	1
.	1
.	1
.	1
.	1
.	1
.	1
.	1
.	1
.	1
.	1
.	1
.	1
.	1
.	1
.	1
.	1
.	1
.	1
.	1
.	1
.	1
.	1
.	1
.	1
.	1
.	1
.	1
.	1
.	1
.	1

## Sheet: Mov Ocular Madre
Miradas sujeto 1
Mhdl	6
.	1
.	1
Mira la silla	15
Mppl	13
.	1
.	1
.	1
Mnñ	7
Mppl	13
.	1
.	1
.	1
Mjgt2	3
Mjgt3	4
.	1
.	1
Mnñ	7
.	1
.	1
.	1
.	1
MrExñ	9
.	1
.	1
Mhdl	6
.	1
.	1
.	1
.	1
.	1
MrExñ	9
.	1
.	1
.	1
.	1
.	1
.	1
.	1
.	1
.	1
.	1
.	1
.	1
.	1
.	1
.	1
.	1
.	1
.	1
Mnñ	7
.	1
.	1
.	1
.	1
.	1
.	1
.	1
.	1
.	1
Mnñ	7
.	1
.	1
Mhdl	6
.	1
.	1
.	1
.	1
.	1
.	1
.	1
.	1
.	1
.	1
.	1
.	1
.	1
.	1
.	1
.	1
.	1
.	1
.	1
.	1
.	1
.	1
.	1
.	1
.	1
.	1
.	1
.	1
.	1
.	1
.	1
.	1
.	1
.	1
.	1
.	1
.	1
.	1
.	1
.	1
.	1
.	1
.	1
.	1
.	1
.	1
.	1
.	1
.	1
.	1
Mnñ	7
.	1
.	1
Mnñ	7
.	1
.	1
.	1
.	1
.	1
Mnñ	7
.	1
.	1
.	1
.	1
.	1
.	1
Mrhat	11
.	1
.	1
Mhdl	6
.	1
.	1
.	1
Mhdl	6
.	1
.	1
.	1
Msl	10
.	1
.	1
.	1
.	1
.	1
.	1
.	1
.	1
.	1
Mnñ	7
.	1
.	1
.	1
.	1
.	1
.	1
.	1
.	1
.	1
.	1
.	1
.	1
.	1
.	1
.	1
.	1
.	1
.	1
.	1
.	1
.	1
.	1
.	1
.	1
.	1
.	1
.	1
Mnñ	7
Mjgt3	4
.	1
.	1
Mjgt2	3
.	1
.	1
.	1
.	1
.	1
.	1
.	1
.	1
.	1
.	1
.	1
.	1
.	1
.	1
.	1
.	1
.	1
.	1
.	1

## Sheet: Mov Ocular Niño
Miradas sujeto 2
Mjgt3	4
.	1
.	1
Mhdl	6
.	1
.	1
.	1
.	1
Mjgt1	2
.	1
.	1
.	1
Mjgt2	3
.	1
.	1
MaMm	8
.	1
Mjgt2	3
.	1
.	1
Mjgt3	4
.	1
Mjgt3	4
MrExñ	9
.	1
.	1
MaMm	8
MrExñ	9
Mhdl	6
.	1
.	1
.	1
.	1
MrExñ	9
.	1
.	1
.	1
.	1
.	1
.	1
.	1
Mjgt2	3
Mjgt3	4
.	1
.	1
.	1
.	1
.	1
.	1
.	1
.	1
.	1
MaMm	8
.	1
Mrhld	12
.	1
Mjgt1	2
.	1
.	1
.	1
Mjgt1	2
MrExñ	9
.	1
.	1
.	1
MaMm	8
.	1
MrExñ	9
Mjgt1	2
MrExñ	9
Mjgt2 y 1	14
.	1
.	1
Mrhld	12
.	1
.	1
.	1
.	1
.	1
Mjgt3	4
.	1
.	1
.	1
.	1
.	1
Mrhld	12
.	1
Mjgt3	4
.	1
.	1
.	1
.	1
.	1
.	1
.	1
.	1
Msl	10
.	1
.	1
.	1
MrExñ	9
.	1
.	1
Mhdl	6
MaMm	8
.	1
Mjgt3	4
.	1
.	1
Mjgt1	2
.	1
.	1
	1
.	1
.	1
.	1
.	1
.	1
.	1
.	1
.	1
Mjgt2	3
.	1
.	1
.	1
.	1
.	1
.	1
Mrhat	11
.	1
.	1
.	1
.	1
Mhdl	6
.	1
.	1
Mhdl	6
.	1
.	1
.	1
.	1
.	1
MaMm	8
.	1
Mjgt3	4
.	1
.	1
MaMm	8
.	1
Mhdl	6
.	1
MaMm	8
.	1
.	1
.	1
MrExñ	9
.	1
.	1
Mhdl	6
.	1
.	1
MaMm	8
.	1
.	1
.	1
MrExñ	9
.	1
MaMm	8
.	1
.	1
Mjgt3	4
.	1
.	1
.	1
Mjgt1	2
.	1
.	1
.	1
MaMm	8
Mjgt3	4
.	1
.	1
Mjgts	5
.	1
.	1
.	1
.	1
.	1
.	1
.	1
Mjgt2	3
.	1
.	1
.	1
Mhdl	6
.	1
.	1
.	1
Mjgt1	2
.	1
.	1
Mjgt2	3
.	1

## Sheet: Mov Ocular Extraño
Miradas sujeto 3
.	1
.	1
.	1
.	1
.	1
.	1
.	1
.	1
.	1
.	1
.	1
.	1
.	1
.	1
.	1
.	1
.	1
.	1
.	1
.	1
.	1
.	1
.	1
.	1
.	1
.	1
Mppl	13
.	1
.	1
.	1
.	1
MaMm	8
.	1
.	1
.	1
.	1
Mnñ	7
.	1
.	1
.	1
.	1
.	1
.	1
.	1
.	1
.	1
.	1
.	1
.	1
.	1
Mnñ	7
.	1
.	1
.	1
.	1
.	1
.	1
.	1
.	1
.	1
.	1
.	1
.	1
.	1
.	1
.	1
.	1
.	1
.	1
.	1
.	1
Mppl	13
.	1
.	1
.	1
Mnñ	7
.	1
.	1
Mjgt3	4
.	1
.	1
.	1
.	1
.	1
.	1
Mppl	13
Mnñ	7
.	1
.	1
Mnñ	7
.	1
Mnñ	7
.	1
.	1
.	1
.	1
.	1
.	1
.	1
.	1
.	1
.	1
.	1
.	1
.	1
.	1
.	1
.	1
.	1
.	1
.	1
.	1
.	1
.	1
.	1
.	1
.	1
.	1
.	1
.	1
.	1
.	1
.	1
.	1
.	1
.	1
.	1
.	1
.	1
.	1
.	1
.	1
.	1
.	1
.	1
.	1
.	1
.	1
.	1
.	1
.	1
.	1
.	1
.	1
.	1
.	1
.	1
.	1
.	1
.	1
.	1
.	1
.	1
.	1
.	1
Mnñ	7
.	1
Mjgt3	4
.	1
.	1
.	1
.	1
.	1
.	1
.	1
.	1
.	1
.	1
.	1
.	1
.	1
.	1
.	1
.	1
.	1
.	1
.	1
.	1
.	1
.	1
.	1
.	1
.	1
.	1
.	1
.	1
.	1
.	1
.	1
.	1
.	1
.	1
.	1
.	1
.	1
.	1
.	1
.	1
.	1
.	1
.	1
.	1
.	1
