# Supplementary material for: Categorical Cross‐Recurrence Quantification Analysis Applied to Communicative Interaction during Ainsworth’s Strange Situation
Source: Hindawi journal article supplement (doi:10.1155/2018/4547029), 2018-01-01
Supplement: f1 [file 4547029.f1.zip › 4547029.f1/Video 2/Words V2/Original_Words_Ca_V2.txt]

1
2
3
4
5
5
5
5
5
6
7
8
9
10
11
12
13
5
5
14
15
16
17
15
14
15
18
19
20
5
5
5
5
5
6
11
21
5
5
5
5
5
22
5
5
5
5
5
5
5
5
5
5
5
5
5
5
5
5
5
23
5
5
5
5
5
5
5
5
5
5
5
5
5
5
5
5
5
5
5
5
5
5
5
5
5
5
5
5
5
5
5
5
5
5
5
5
5
5
5
5
5
5
5
5
5
5
24
25
26
27
5
5
5
5
5
5
5
5
5
5
5
5
5
5
5
5
5
5
5
5
5
5
5
5
5
5
5
5
9
5
5
5
5
5
5
5
5
5
5
5
5
5
9
5
5
5
5
5
5
5
5
5
5
5
28
29
5
5
5
5
5
5
5
5
5
5
5
5
30
5
5
5
5
5
5
5
5
5
5
5
5
5
5
5
5
5
5
5
5
5
5
5
5
5
5
5
5
5
8
31
32
5
5
5
5
5
5
5
5
5
5
5
5
5
5
5
5
5
5
5
5
5
5
5
5
5
5
5
5
5
5
5
5
5
5
5
5
5
5
5
5
5
5
5
5
5
5
5
5
5
5
5
5
5
5
5
5
5
5
5
5
5
5
5
5
33
34
35
36
37
38
11
39
40
5
5
5
5
5
5
5
41
42
4
30
43
5
5
5
5
44
45
46
40
27
47
48
49
29
9
50
5
51
18
52
4
5
5
5
5
5
5
5
5
5
5
5
5
5
5
5
53
29
5
5
5
5
53
29
5
54
17
55
56
57
58
59
60
5
57
61
62
63
40
64
46
47
61
9
65
66
57
46
67
37
68
27
5
69
70
71
5
5
5
5
5
5
5
5
47
43
72
73
5
5
5
5
5
14
74
75
76
5
77
73
72
78
