# Supplementary material for: Categorical Cross‐Recurrence Quantification Analysis Applied to Communicative Interaction during Ainsworth’s Strange Situation
Source: Hindawi journal article supplement (doi:10.1155/2018/4547029), 2018-01-01
Supplement: f1 [file 4547029.f1.zip › 4547029.f1/Video 2/Words V2/Original_Words_St_V2.txt]

5
5
5
5
5
5
5
5
5
5
5
5
5
5
5
5
5
5
5
5
5
5
5
5
5
5
5
5
5
5
5
5
5
5
5
5
5
5
22
87
88
89
5
90
91
92
93
10
94
17
95
96
5
97
98
99
37
100
17
101
5
102
103
104
64
105
106
17
101
107
108
92
17
109
70
37
10
110
37
111
112
113
114
107
115
116
112
117
118
105
119
120
108
3
112
121
17
109
70
37
10
122
112
123
64
17
124
5
5
5
5
23
125
11
126
4
107
127
10
128
129
130
112
131
132
133
134
4
125
135
37
136
70
20
12
119
137
138
29
5
139
37
140
98
141
4
120
135
37
142
143
144
29
5
14
101
145
146
147
148
149
150
151
143
20
5
5
152
37
11
153
154
155
112
156
157
158
159
160
5
75
9
96
161
144
162
98
163
164
165
166
37
167
23
135
159
168
169
70
130
112
170
112
171
72
172
22
124
5
124
5
5
5
57
124
18
173
123
174
62
123
112
164
17
175
18
176
177
178
27
179
4
44
180
112
181
16
5
52
4
199
182
8
183
2
184
72
185
52
4
186
187
188
129
5
5
5
5
53
37
189
18
187
19
64
190
191
71
4
5
5
5
5
5
5
5
5
5
5
5
5
5
5
5
5
5
5
5
5
5
5
5
5
5
5
5
5
5
5
5
5
5
5
5
5
5
5
5
5
5
5
5
5
5
5
5
5
5
5
5
5
5
53
192
65
66
193
129
64
186
5
193
64
194
195
9
196
5
5
5
5
5
5
5
5
5
5
5
5
5
5
5
5
5
5
5
5
5
5
5
5
5
5
5
5
5
5
5
5
5
5
5
5
5
5
5
5
5
5
5
5
5
5
5
5
5
5
5
5
5
5
5
5
5
5
5
5
5
