# Supplementary material for: Categorical Cross‐Recurrence Quantification Analysis Applied to Communicative Interaction during Ainsworth’s Strange Situation
Source: Hindawi journal article supplement (doi:10.1155/2018/4547029), 2018-01-01
Supplement: f1 [file 4547029.f1.zip › 4547029.f1/Video 2/Words V2/Randomized_Words_Ca_V2.txt]

5
5
5
5
54
5
5
5
5
5
72
5
5
37
5
5
5
5
5
5
4
5
5
38
5
69
70
5
5
40
62
5
5
43
20
5
5
47
5
5
5
5
5
37
5
5
5
5
5
14
5
5
5
5
5
15
5
1
15
73
5
5
5
55
5
78
5
5
5
5
5
5
39
46
5
31
73
5
5
49
5
67
5
75
56
5
5
5
29
5
5
5
5
5
5
5
5
71
5
5
35
18
61
14
44
5
5
5
5
5
5
5
24
5
5
23
5
5
5
5
5
5
5
9
5
5
5
5
5
5
40
5
52
5
33
5
5
43
5
5
5
5
5
5
5
5
5
5
29
5
77
6
32
13
5
5
5
5
5
27
5
5
5
5
17
5
5
46
3
5
5
11
46
5
18
5
5
5
5
5
47
5
5
5
5
5
5
5
51
5
5
5
5
53
5
5
5
65
5
5
5
5
5
5
5
5
5
5
5
5
27
5
5
5
61
17
5
5
8
5
2
5
5
5
5
5
5
5
5
5
26
5
5
66
5
5
5
5
57
5
5
22
5
5
5
9
5
5
8
5
5
5
47
14
36
5
29
57
5
5
5
4
60
74
5
5
5
19
5
7
57
5
5
5
5
5
28
5
5
5
5
5
5
5
5
5
5
5
10
5
15
5
5
5
72
58
5
5
25
5
5
5
5
9
5
5
5
5
34
5
48
59
5
5
5
5
68
5
5
27
5
5
21
5
5
64
5
5
5
5
5
5
5
5
76
5
5
5
9
42
5
63
5
5
5
5
5
5
5
5
5
5
50
5
5
5
9
5
40
5
5
5
5
30
29
5
6
5
5
11
5
5
5
5
5
5
5
5
5
5
5
41
5
45
11
5
5
5
53
5
5
5
30
16
12
5
5
4
