# Supplementary material for: Categorical Cross‐Recurrence Quantification Analysis Applied to Communicative Interaction during Ainsworth’s Strange Situation
Source: Hindawi journal article supplement (doi:10.1155/2018/4547029), 2018-01-01
Supplement: f1 [file 4547029.f1.zip › 4547029.f1/Video 2/Words V2/Randomized_Words_Ch_V2.txt]

5
5
5
83
5
82
5
5
5
5
84
5
5
5
5
5
81
5
5
5
5
5
5
5
5
5
5
5
5
5
5
5
80
5
5
5
80
5
5
5
5
5
5
5
5
5
5
5
5
5
5
5
5
5
5
5
5
5
5
5
5
5
5
82
5
85
5
5
5
5
5
5
5
83
83
5
5
5
5
5
5
5
5
5
5
82
5
5
5
5
5
93
5
5
5
5
5
5
5
5
5
5
5
82
5
5
5
5
5
81
5
5
5
5
5
83
5
84
5
5
5
5
5
5
5
5
5
5
83
5
5
5
83
5
5
5
5
5
5
5
5
5
5
83
5
5
5
5
5
5
81
5
82
5
80
5
5
5
5
5
5
5
5
5
5
5
5
5
5
5
5
5
5
5
5
5
5
83
5
5
5
84
5
5
5
5
5
5
5
5
5
5
5
5
5
5
5
5
5
83
5
83
5
5
5
5
5
80
5
5
5
5
83
5
5
5
5
5
5
5
5
5
5
5
5
5
5
5
82
5
5
5
5
5
5
5
81
5
5
5
5
5
5
5
5
5
5
5
5
5
5
5
5
5
5
82
5
5
5
5
5
5
5
5
5
5
5
5
5
5
5
5
5
5
5
5
5
5
84
5
5
5
82
82
5
5
5
82
5
5
5
5
5
5
5
81
5
83
5
5
5
5
5
5
82
5
5
5
5
5
83
5
5
80
5
5
5
80
85
5
82
5
5
5
5
5
5
83
5
5
5
5
5
5
5
5
5
82
5
5
5
5
81
5
5
5
5
5
5
5
5
5
5
5
5
5
5
5
5
5
84
5
5
83
5
5
5
5
5
5
82
5
5
5
5
5
5
5
5
5
5
5
5
5
198
5
5
5
82
5
5
5
5
81
5
83
5
5
