# Supplementary material for: Categorical Cross‐Recurrence Quantification Analysis Applied to Communicative Interaction during Ainsworth’s Strange Situation
Source: Hindawi journal article supplement (doi:10.1155/2018/4547029), 2018-01-01
Supplement: f1 [file 4547029.f1.zip › 4547029.f1/Video 2/Words V2/Randomized_Words_St_V2.txt]

193
164
75
114
147
118
190
166
53
144
5
5
186
124
105
186
5
5
70
108
5
182
17
88
5
119
196
5
10
5
5
5
5
5
183
149
5
139
99
64
5
5
137
5
37
5
5
146
112
5
5
148
163
154
5
5
5
22
5
94
17
5
111
5
70
5
5
129
5
5
134
5
5
176
5
169
5
5
98
5
107
5
138
5
167
179
57
126
92
194
5
151
103
5
121
5
160
158
5
129
5
4
5
5
5
5
168
135
37
112
143
5
64
130
5
136
159
5
5
135
5
8
5
5
5
18
112
174
5
5
37
113
5
95
5
177
93
193
5
184
5
5
3
181
5
18
130
171
17
23
5
108
153
112
112
5
23
124
5
127
22
5
142
100
5
5
66
10
5
5
5
5
112
5
5
4
29
129
122
112
98
135
5
5
37
5
5
102
44
155
64
125
189
120
5
5
5
172
107
5
165
5
5
5
112
37
170
185
96
133
5
17
10
14
5
27
123
5
5
17
5
5
10
5
4
5
5
5
5
5
101
5
5
5
5
5
5
9
125
5
5
5
96
4
5
120
178
18
145
5
52
123
5
87
5
5
123
5
5
187
162
65
29
5
53
5
4
101
192
112
64
5
5
115
5
119
5
62
71
5
5
5
104
5
98
91
110
5
5
159
175
16
70
5
5
5
5
5
128
5
37
161
37
157
191
5
132
109
97
107
92
5
70
5
109
5
101
5
11
150
116
5
5
20
187
5
5
5
9
180
188
5
5
5
5
5
37
5
144
5
5
199
5
52
5
20
5
5
4
5
72
19
105
106
11
173
5
124
164
17
37
72
5
140
141
5
5
89
90
195
5
156
5
112
37
5
5
152
5
124
5
5
131
143
5
5
64
12
117
5
5
4
5
17
2
5
5
5
